# Supplementary material
Source: PubMed Central journal article supplement (PMC3190795)
Supplement: supp_M111.257444_jbc.M111.257444-1.pdf [file supp_M111.257444_jbc.M111.257444-1.pdf]

FIGURE S1

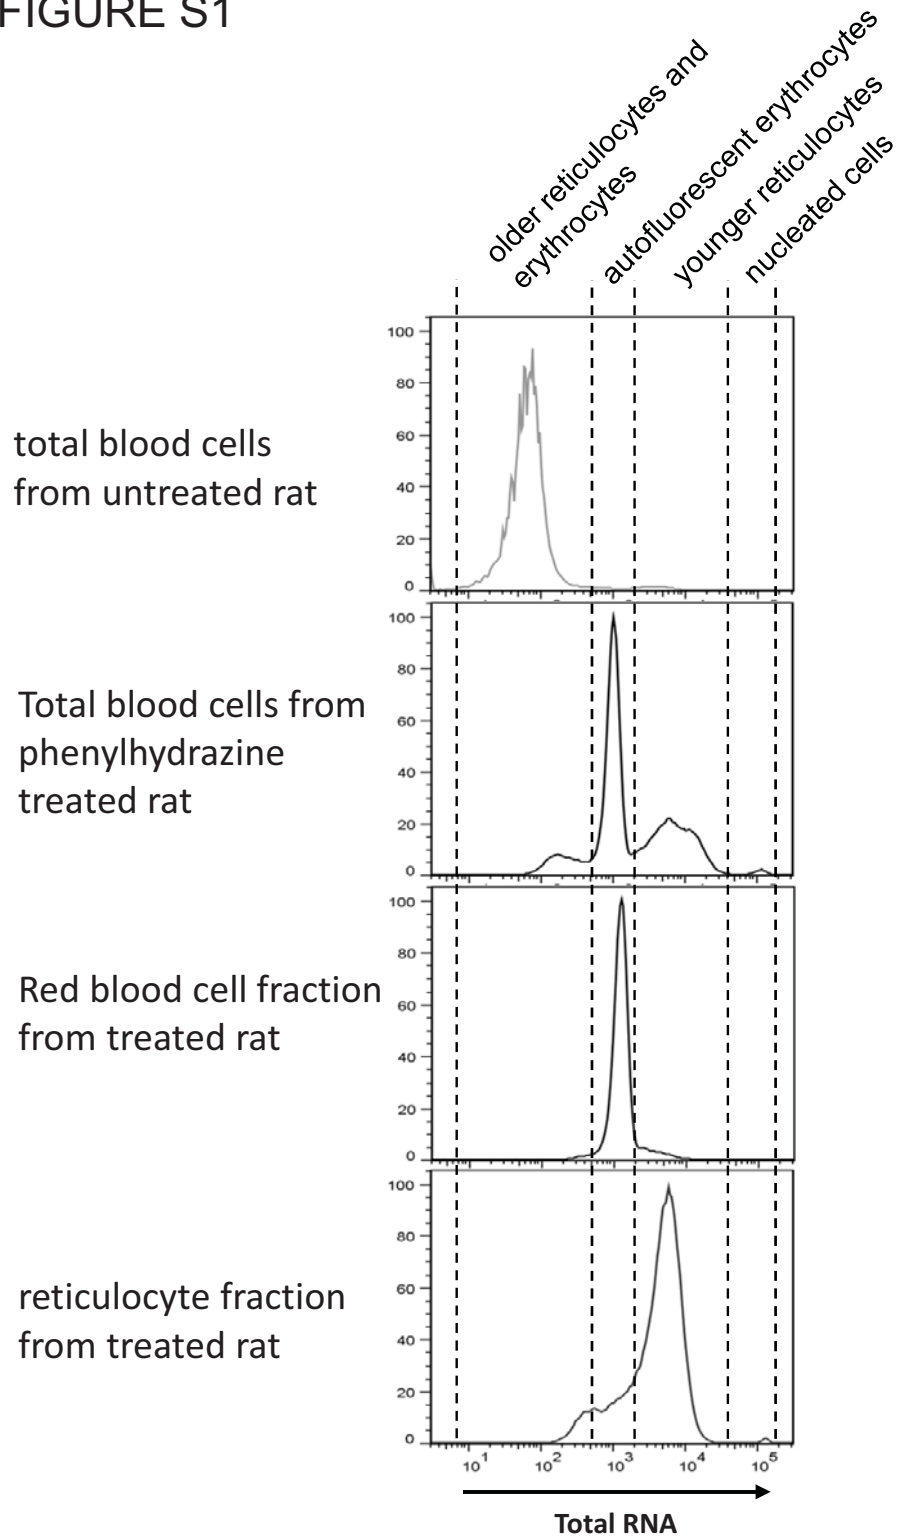

**Monitoring the reticulocytes' purity after percoll separation**

Representative FACS analysis on different fractions of blood cells labelled with Syto12 to visualize the intracellular RNA contents. In treated rats, mature erythrocytes become highly autofluorescent because of precipitated hemoglobin.

FIGURE S2

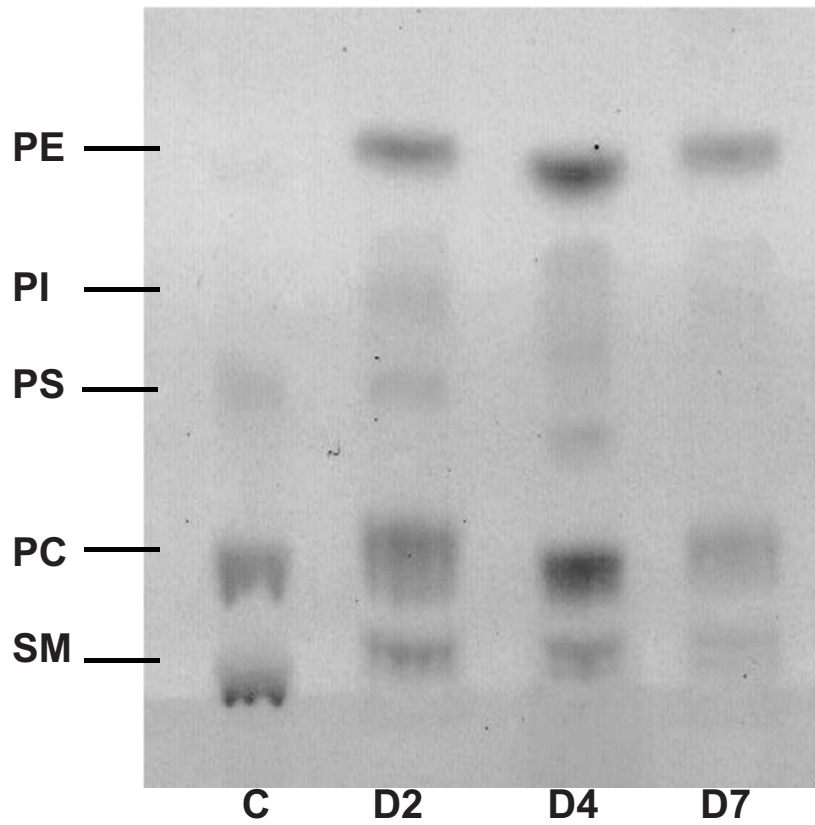

**Assessment of the lipid composition of exosomes by HPTLC**

C is the control lane, which contains a mix of pure DPPE, POPC, bovine brain SM and bovine PS. D2, D4 and D7 lipid fractions were extracted from exosomes corresponding to 50µg of proteins. Similar results were obtained in 3 other independent experiments.
