# Supplementary material
Source: PubMed Central journal article supplement (PMC3190795)
Supplement: supp_M111.257444_jbc.M111.257444-2.pdf [file supp_M111.257444_jbc.M111.257444-2.pdf]

**Table S1**

Analysis of the evolution of the relative abundance of proteins identified by MS/MS spectrometry

The colour code is the same as that used in Figure 4:

only in D2, D2/D7 > 2, 2 > D2/D7 > 0.5, D2/D7 < 0.5, only in D7, non reproducible ratio

| Identified protein                                                      | Gene   | MW     | mean ratio<br>D2/D7 | ratio D2/D7 |       |        |
|-------------------------------------------------------------------------|--------|--------|---------------------|-------------|-------|--------|
|                                                                         |        |        |                     | Run 1       | Run 2 | Q-Star |
| <b>(1) Antigen presentation</b>                                         |        |        |                     |             |       |        |
| MHC class I                                                             |        |        |                     |             |       |        |
| RT1.A1(F) protein (Fragment)                                            | Q31257 | 39507  | 4,72                | 6,09        | 3,35  | 6,22   |
| RT1.A(U) alpha chain (Fragment)                                         | Q95571 | 39050  | 4,79                | 5,95        | 3,63  | 4,54   |
| MHC class Ib RT1.S3 (Fragment)                                          | Q7JJ65 | 40199  | D2                  | D2          | D2    | D2     |
| BM1 (Histocompatibility 2, T region locus 24)                           | Q4G002 | 42891  | D2                  | D2          | D2    |        |
| Beta-2-microglobulin                                                    | P07151 | 13720  | D2                  | D2          | D2    |        |
| <b>(2) Cell adhesion</b>                                                |        |        |                     |             |       |        |
| Thrombospondin 1                                                        | Q71SA3 | 133579 | 0,50                | 0,30        | 0,70  |        |
| Thrombospondin-4 (Putative uncharacterized protein Thbs4)               | D3ZFP9 | 110882 | 0,11                | D7          | 0,22  | D7     |
| Putative uncharacterized protein Itga4 (integrin alpha 4)               | D3ZMQ3 | 115592 | D2                  | D2          | D2    |        |
| integrin alpha 2b                                                       | D3ZAC0 | 114075 | 3,46                | 5,75        | 1,17  | 1,41   |
| Integrin CD29 b1                                                        | ITB1   | 91686  | 3,22                | D2          | 3,22  | D2     |
| Integrin beta                                                           | Q8R2H2 | 90066  | 1,89                | 2,67        | 1,12  | 1,13   |
| Putative uncharacterized protein RGD1565416                             | D3ZA84 | 273795 | D7                  | D7          | D7    |        |
| Putative uncharacterized protein Icam4                                  | D3ZP29 | 28809  | D7                  | D7          | D7    |        |
| <b>(3) Cell structure et motility</b>                                   |        |        |                     |             |       |        |
| Stomatin                                                                | Q5XI04 | 31530  | 1,74                | 2,57        | 0,90  | 1,23   |
| Adenylyl cyclase-associated protein 1                                   | CAP1   | 51899  | 1,20                | 0,13        | 2,26  | D2     |
| Moesin                                                                  | MOES   | 67867  | 3,57                | 3,57        | D2    | D2     |
| Myosin-9                                                                | MYH9   | 227566 | 1,61                | 0,52        | 2,70  |        |
| Actin, cytoplasmic 2                                                    | ACTG   | 42108  | 0,63                | 0,99        | 0,89  | 1,53   |
| Actin-related protein 2                                                 | ARP2   | 44990  | 0,89                | 0,40        | 1,38  |        |
| Actin-related protein 2/3 complex subunit 1A                            | ARC1A  | 42143  | D7                  | D7          | D7    | D7     |
| Actin-related protein 2/3 complex subunit 1B                            | ARC1B  | 41829  | 1,01                | 0,11        | 1,90  |        |
| Actin-related protein 2/3 complex subunit 2                             | ARPC2  | 34484  | 0,57                | 0,19        | 0,95  | D7     |
| Actin related protein 2/3 complex, subunit 3                            | B2GV73 | 20750  | 0,58                | 0,33        | 0,83  | D7     |
| Actin related protein 2/3 complex, subunit 4 (Predicted), isoform CRA_a | B2RZ72 | 19768  | 0,80                | D7          | 0,80  |        |
| Actin-related protein 3                                                 | ARP3   | 47783  | 0,67                | 0,21        | 1,13  | D7     |
| ARP10 actin-related protein 10 homolog (S. cerevisiae)                  | Q5M9F7 | 46214  | D7                  | D7          | D7    |        |
| Tln1 protein                                                            | Q498D4 | 163473 | 0,47                | 0,18        | 0,76  |        |
| Calmodulin                                                              | CALM   | 16827  | D2                  | D2          | D2    | D2     |
| Coronin-1A                                                              | COR1A  | 51065  | 9,39                | 3,25        | 15,53 |        |
| Dynamamin-1-like protein                                                | DNM1L  | 83908  | 0,14                | D7          | 0,28  |        |
| Dynamamin-2                                                             | DYN2   | 98511  | 0,27                | 0,04        | 0,51  |        |
| Gelsolin                                                                | Q68FP1 | 86068  | 0,24                | D7          | 0,47  |        |
| Vinculin                                                                | VINC   | 117112 | 4,61                | D2          | 4,61  | D2     |
| Erythroid spectrin alpha                                                | D3ZNU8 | 281212 | 0,14                | 0,03        | 0,25  | D7     |
| Erythroid spectrin beta                                                 | Q6XDA0 | 246974 | 0,03                | D7          | 0,07  | D7     |
| Putative uncharacterized protein Epb4.1                                 | D3ZHS9 | D3ZHS9 | 0,14                | 0,15        | 0,13  |        |
| Erythrocyte protein band 4.2 (Predicted)                                | B5DF57 | 76740  | 0,29                | 0,40        | 0,18  |        |
| Galectin-5                                                              | LEG5   | 16414  | 0,65                | 0,57        | 0,73  |        |
| Centromere/kinetochore protein zw10 homolog                             | Q4V8C2 | 87967  | D2                  | D2          | D2    |        |
| Septin-2                                                                | Q91Y81 | 41793  | 0,13                | 0,07        | 0,19  |        |
| Microtubule-associated protein RP/EB family member 1                    | Q66HR2 | 30004  | D7                  | D7          | D7    |        |
| Microtubule-associated proteins 1A/1B light chain 3B                    | MLP3B  | 16441  | D2                  | D2          | D2 S3 |        |
| Putative uncharacterized protein Sirt2                                  | D3ZME8 | 43626  | 0,23                | 0,13        | 0,33  |        |
| Calpain small subunit 1                                                 | Q64537 | 28570  | D7                  | D7          | D7    |        |
| Calpain-5                                                               | CAN5   | 74045  | D2                  | D2          | D2    |        |
| Kinesin-like protein KIF15                                              | KIF15  | 159540 | D7                  | D7          | D7    |        |
| Kinesin-1 heavy chain                                                   | KINH   | 110204 | D7                  | D7          | D7    |        |
| Tubulin beta-2C chain                                                   | TBB2C  | 50225  | 1,07                | 0,60        | 1,55  | 0,38   |
| Tubulin alpha-1B chain                                                  | TBA1B  | 50803  | 0,75                | 0,38        | 1,12  | 0,84   |
| Filamin alpha                                                           | C0JPT7 | 283056 | 0,65                | 0,41        | 0,90  |        |
| Platelet-activating factor acetylhydrolase IB subunit alpha             | LIS1   | 47210  | 0,25                | D7          | 0,50  |        |
| Cofilin-1                                                               | COF1   | 18748  | 1,20                | 0,82        | 1,57  |        |
| Profilin-1                                                              | PROF1  | 15119  | 2,30                | 2,40        | 2,20  |        |
| <b>(4) Heat shock proteins and chaperonnes</b>                          |        |        |                     |             |       |        |
| DnaJ (Hsp40) homolog                                                    |        |        |                     |             |       |        |

|                                                                                                 |        |        |       |      |       |      |
|-------------------------------------------------------------------------------------------------|--------|--------|-------|------|-------|------|
| subfamily B, member 1                                                                           | B0K030 | 38294  | 3,69  | 4,44 | 2,94  |      |
| subfamily B, member 4                                                                           | Q5XIP0 | 37969  | 6,00  | 6,00 | Abs   |      |
| subfamily B member 6                                                                            | DNJB6  | 39012  | 2,00  | D2   | 2,00  |      |
| subfamily C member 5                                                                            | P60905 | 22885  | D2    | D2   | D2    |      |
| Putative uncharacterized protein Dnajc13                                                        | D3ZNI6 | 209275 | 0,27  | D7   | 0,53  |      |
| Hsc70-interacting protein                                                                       | P50503 | 41424  | 12,25 | D2   | 12,50 |      |
| Heat Shock cognate 71 kDa protein (Hsc 70)                                                      | HSP7C  | 71055  | 2,26  | 2,45 | 2,06  | 2,05 |
| BAG family molecular chaperone regulator 5                                                      | Q5QJC9 | 51030  | D2    | D2   | D2    |      |
| Heat shock 70 kDa protein 1A/1B                                                                 | HSP71  | 70427  | 1,17  | D2   | 1,17  |      |
| Heat shock 70 kDa protein 4                                                                     | HSP74  | 94057  | 0,18  | 0,05 | 0,32  |      |
| Endoplasmin                                                                                     | ENPL   | 92998  | 0,69  | 0,71 | 0,67  |      |
| Stress-induced-phosphoprotein 1                                                                 | STIP1  | 63157  | 5,57  | 4,00 | 7,14  |      |
| 78 kDa glucose-regulated protein, HSPa5                                                         | GRP78  | 72473  | 2,05  | 2,35 | 1,76  | D2   |
| HSP 90 alpha                                                                                    | HS90A  | 85160  | 0,38  | 0,26 | 0,51  | D7   |
| HSP 90 beta                                                                                     | HS90B  | 83571  | 0,22  | D7   | 0,44  | D7   |
| T-complex protein 1                                                                             |        |        |       |      |       |      |
| alpha                                                                                           | TCPA   | 60834  | 0,47  | 0,22 | 0,71  | D7   |
| beta                                                                                            | TCPB   | 57764  | 0,54  | 0,23 | 0,85  | 0,11 |
| delta                                                                                           | TCPD   | 58775  | 0,55  | 0,25 | 0,86  | 0,15 |
| epsilon                                                                                         | TCPE   | 59954  | 0,49  | 0,20 | 0,78  | D7   |
| gamma                                                                                           | TCPG   | 61178  | 0,38  | 0,12 | 0,64  | D7   |
| Chaperonin subunit 6a (Zeta)                                                                    | Q3MHS9 | 58437  | 0,50  | 0,21 | 0,78  | 0,15 |
| eta (RCG55994, isoform CRA_c)                                                                   | D4AC23 | 60133  | 0,53  | 0,26 | 0,81  |      |
|                                                                                                 |        |        |       |      |       |      |
| <b>(5) Metabolic enzymes</b>                                                                    |        |        |       |      |       |      |
| Peroxisomal multifunctional enzyme type 2                                                       | P97852 | 79428  | 3,47  | D2   | 3,47  |      |
| Peroxiredoxin-1                                                                                 | PRDX2  | 22109  | 0,17  | D7   | 0,35  |      |
| Pyridoxal phosphate phosphatase                                                                 | PLPP   | 33115  | D7    | D7   | D7    |      |
| Transketolase                                                                                   | TKT    | 68342  | 1,74  | 0,08 | 3,40  |      |
| α-enolase (ENO-1)                                                                               | ENOA   | 47440  | 0,93  | 0,39 | 1,48  | 0,50 |
| Enoyl-CoA hydratase domain-containing protein 1                                                 | Q6AYG5 | 32631  | D7    | D7   | D7    |      |
| Glyceraldehyde-3-phosphate dehydrogenase                                                        | G3P    | 36090  | 0,69  | 0,54 | 0,83  | 0,44 |
| Phosphoglycerate Kinase 1                                                                       | PGK1   | 44909  | 0,89  | 0,30 | 1,48  | 0,70 |
| Phosphoglycerate mutase                                                                         | Q6P6G4 | 30229  | 0,25  | 0,20 | 0,30  | D7   |
| Triosephosphate isomerase                                                                       | TPIS   | 27345  | 0,43  | 0,23 | 0,63  |      |
| 6-phosphofructokinase, liver type                                                               | K6PL   | 86083  | 0,16  | 0,04 | 0,44  | D7   |
| 6-phosphofructo-1-kinase, M-type                                                                | Q52KS1 | 85343  | D7    | D7   | D7    |      |
| 6-phosphogluconolactonase                                                                       | P85971 | 27234  | D7    | D7   | D7    |      |
| Pyruvate Kinase M2                                                                              | Q6P7S0 | 53472  | 12,58 | D2   | 12,58 | D2   |
| Pyruvate Kinase isoenzyme L/R                                                                   | KPYR   | 62503  | 0,08  | D7   | 0,16  | D7   |
| Ribose-phosphate pyrophosphokinase 1                                                            | PRPS1  | 35325  | 0,11  | 0,13 | 0,20  | D7   |
| Hexokinase-1                                                                                    | HXK1   | 103540 | 0,38  | D7   | 0,76  | 1,00 |
| Galactokinase 1                                                                                 | Q5RKH2 | 42806  | 0,10  | D7   | 0,21  |      |
| Glucose-6-phosphate 1-dehydrogenase                                                             | G6PD   | 59794  | 0,66  | 0,09 | 1,24  | D7   |
| L-lactate dehydrogenase A chain                                                                 | LDHA   | 36712  | 1,16  | 1,16 | 1,15  |      |
| L-lactate dehydrogenase B chain                                                                 | LDHB   | 36612  | D7    | D7   | D7    |      |
| 6-phosphogluconate dehydrogenase, decarboxylating                                               | 6PGD   | 53715  | 0,66  | 0,16 | 1,15  |      |
| Malate dehydrogenase, cytoplasmic                                                               | MDHC   | 36631  | 0,32  | 0,29 | 0,35  | D7   |
| Aldehyde dehydrogenase family 16 member A1                                                      | A16A1  | 86159  | 0,21  | D7   | 0,42  | D7   |
| Aldose reductase                                                                                | ALDR   | 35797  | D7    | D7   | D7    |      |
| Fructose-bisphosphate aldolase A                                                                | ALDOA  | 39783  | 0,86  | 0,73 | 1,00  |      |
| Alcohol dehydrogenase [NADP+]                                                                   | AK1A1  | 36711  | 0,05  | 0,11 | D7    |      |
| Alcohol dehydrogenase class-3                                                                   | ADHX   | 40348  | D7    | D7   | D7    |      |
| 4-trimethylaminobutyraldehyde dehydrogenase                                                     | AL9A1  | 54530  | 0,27  | D7   | 0,53  |      |
| Aflatoxin B1 aldehyde reductase member 2                                                        | ARK72  | 41105  | 0,25  | 0,14 | 0,36  | D7   |
| Aflatoxin B1 aldehyde reductase member 3                                                        | ARK73  | 37122  | 0,30  | 0,07 | 0,53  | D7   |
| Adenosine kinase                                                                                | ADK    | 40450  | D7    | D7   | D7    |      |
| Protein phosphatase 2A activator, regulatory subunit 4                                          | B2RYQ2 | 36879  | D7    | D7   | D7    | D7   |
| Protein phosphatase 2 (Formerly 2A), regulatory subunit A (PR 65), alpha isoform, isoform CRA_a | Q5XI34 | 65323  | 0,26  | 0,06 | 0,45  |      |
| Low molecular weight phosphotyrosine protein phosphatase                                        | PPAC   | 18596  | 0,26  | 0,33 | 0,18  | D7   |
| Guanine deaminase                                                                               | Q9JKB7 | 51554  | 0,44  | 0,32 | 0,57  | D7   |
| Aminopeptidase B                                                                                | AMPB   | 72620  | 1,59  | D7   | 3,17  |      |
| Ppa1 protein (Fragment)                                                                         | Q499R7 | 38223  | 0,02  | 0,04 | D7    | D7   |
| Acylamino-acid-releasing enzyme                                                                 | P13676 | 82415  | 0,03  | D7   | 0,07  | D7   |
| Putative uncharacterized protein Mphosph8                                                       | D4A5B4 | 138708 | D7    | D7   | D7    |      |
| NAD(P)(+)-arg ADP-ribosyltransferase (Frgmt)                                                    | Q6LAL6 | 20247  | 1,88  | 2,00 | 1,75  | 3,00 |
| Glutathione peroxidase 1                                                                        | GPX1   | 22463  | 0,42  | 0,27 | 0,58  | 0,22 |
| S-formylglutathione hydrolase                                                                   | ESTD   | 31971  | 0,20  | 0,14 | 0,26  | D7   |
| Bis(5'-nucleosyl)-tetrakisphosphate [asymmetrical]                                              | AP4A   | 17090  | 0,20  | D7   | 0,40  |      |
| Glutamate--cysteine ligase catalytic subunit                                                    | GSH1   | 73371  | D7    | D7   | D7    |      |
| 3-mercaptopyruvate sulfurtransferase                                                            | THTM   | 33205  | 0,50  | 0,28 | 0,72  | 0,15 |
| Hypoxanthine-guanine phosphoribosyltransferase                                                  | HPRT   | 24690  | 0,29  | 0,27 | 0,31  | D7   |
| Glutathione S-transferase Mu 5                                                                  | GSTM5  | 27067  | D7    | D7   | D7    |      |
| Adenylosuccinate lyase (Predicted)                                                              | D3ZW08 | 54852  | D7    | D7   | D7    |      |

|                                                                                                                |        |        |       |       |       |      |
|----------------------------------------------------------------------------------------------------------------|--------|--------|-------|-------|-------|------|
| Cad protein                                                                                                    | D4A8A0 | 245824 | 0,56  | 0,31  | 0,81  |      |
| Phosphoribosyl pyrophosphate synthetase-associated protein 1                                                   | Q63468 | 39753  | D7    | D7    | D7    |      |
| Carbonyl reductase [NADPH] 1                                                                                   | CBR1   | 30844  | D7    | D7    | D7    |      |
| Arachidonate 12-lipoxygenase, leukocyte-type                                                                   | LX12L  | 76369  | 0,59  | 0,64  | 0,53  | 0,26 |
| Asparagine synthetase [glutamine-hydrolyzing]                                                                  | ASNS   | 64776  | 0,40  | 0,10  | 0,71  | D7   |
| D-3-phosphoglycerate dehydrogenase                                                                             | SERA   | 56493  | D7    | D7    | D7    |      |
| ATP-citrate synthase                                                                                           | ACLY   | 121471 | 0,09  | 0,05  | 0,12  |      |
| Fructosamine-3-kinase-related protein                                                                          | B2RYN1 | 34375  | 0,32  | 0,08  | 0,56  | D7   |
| Prostaglandin E synthase 3                                                                                     | TEBP   | 18995  | 0,23  | D7    | 0,47  | D7   |
| Sepiapterin reductase                                                                                          | P18297 | 28510  | 0,30  | 0,19  | 0,40  | D7   |
| Glutamine synthetase                                                                                           | P09606 | 42982  | D7    | D7    | D7    |      |
| Phosphoserine aminotransferase                                                                                 | Q68FU2 | 40943  | D7    | D7    | D7    |      |
| Fatty acid synthase                                                                                            | FAS    | 275101 | 0,16  | 0,07  | 0,25  |      |
| Multifunctional protein ADE2                                                                                   | P51583 | 47807  | 0,23  | 0,07  | 0,39  |      |
| Bifunctional purine biosynthesis protein PURH                                                                  | PUR9   | 64681  | 0,13  | 0,06  | 0,19  |      |
| Purine nucleoside phosphorylase                                                                                | PNPH   | 32566  | 0,68  | 0,60  | 0,75  |      |
| UMP-CMP kinase                                                                                                 | Q4KM73 | 22169  | D7    | D7    | D7    |      |
| Putative uncharacterized protein Pfas                                                                          | D4AB17 | 138461 | 0,04  | D7    | 0,07  |      |
| Gart protein                                                                                                   | B5DEG6 | 45683  | D7    | D7    | D7    |      |
| Ctps protein                                                                                                   | B1WC02 | 66640  | 0,16  | 0,08  | 0,24  |      |
| Methylenetetrahydrofolate dehydrogenase (NADP+ dependent) 1, cyclohydrolase, formyltetrahydrofolate synthetase | Q5EBC3 | 101598 | 0,32  | 0,13  | 0,51  | D7   |
| Betaine--homocysteine S-methyltransferase 1                                                                    | O09171 | 44976  | D7    | D7    | D7    |      |
| Protein arginine N-methyltransferase 1                                                                         | Q63009 | 40522  | 0,14  | D7    | 0,28  |      |
| Protein arginine N-methyltransferase 5 (Predicted), isoform CRA_a                                              | D4A0E8 | 72695  | D7    | D7    | D7    |      |
| Ribonucleoside-diphosphate reductase                                                                           | Q5U2Q5 | 91091  | 0,25  | 0,05  | 0,45  | D7   |
| Inosine-5'-monophosphate dehydrogenase                                                                         | Q6P9U9 | 56106  | 0,13  | 0,14  | 0,12  |      |
| Spermidine synthase                                                                                            | Q99MI5 | 34545  | 0,15  | D7    | 0,29  | D7   |
| Thimet oligopeptidase                                                                                          | THOP1  | 79191  | 0,11  | D7    | 0,23  |      |
| Carbonic anhydrase 1                                                                                           | CAH1   | 28339  | 1,28  | 1,43  | 1,13  | 1,50 |
| Carbonic anhydrase 2                                                                                           | CAH2   | 29267  | 1,24  | 1,67  | 0,81  | 1,00 |
| Catalase                                                                                                       | CATA   | 60062  | 0,37  | 0,26  | 0,49  | 0,09 |
| Selenium-binding protein 1                                                                                     | Q8VIF7 | 52532  | D7    | D7    | D7    |      |
| Lactoylglutathione lyase                                                                                       | Q6P7Q4 | 20820  | D7    | D7    | D7    |      |
| Obg-like ATPase 1                                                                                              | A0JPD7 | 44792  | 0,32  | 0,32  | 0,33  | D7   |
| Amylo-1, 6-glucosidase, 4-alpha-glucanotransferase (Predicted)                                                 | D4AEH9 | 176729 | D7    | D7    | D7    |      |
| Delta-aminolevulinic acid dehydratase                                                                          | HEM2   | 36464  | 0,51  | 0,47  | 0,55  |      |
| Dihydropteridine reductase                                                                                     | DHPR   | 25764  | D7    | D7    | D7    |      |
| Adenylosuccinate synthetase                                                                                    | D4AEP0 | 50453  | 0,14  | D7    | 0,27  |      |
| Mannose-1-phosphate guanyltransferase alpha                                                                    | GMPPA  | 46504  | 0,15  | D7    | 0,30  |      |
| Pck2 protein (Fragment)                                                                                        | B2RYG2 | 74080  | 3,00  | 3,00  | 3,00  |      |
| Putative uncharacterized protein Hmbs                                                                          | D3ZJU6 | 38056  | 1,09  | 1,23  | 0,96  |      |
| 5'-nucleotidase, cytosolic III                                                                                 | B2GUX5 | 34073  | D7    | D7    | D7    |      |
| GDP-mannose pyrophosphorylase B (Predicted), isoform CRA_a                                                     | D4A746 | D4A746 | D7    | D7    | D7    |      |
| Inosine triphosphatase (Nucleoside triphosphate pyrophosphatase) (Mapped), isoform CRA_a                       | D3ZW55 | 22255  | D7    | D7    | D7    |      |
| Nicotinamide phosphoribosyltransferase                                                                         | NAMPT  | 55689  | D7    | D7    | D7    |      |
| Cytosolic acyl coenzyme A thioester hydrolase                                                                  | BACH   | 43164  | D7    | D7    | D7    |      |
| Tsta3 protein                                                                                                  | B0BNN0 | 31086  | 0,25  | D7    | 0,50  |      |
| LanC-like protein 1                                                                                            | LANC1  | 45952  | 0,08  | D7    | 0,17  |      |
| Monoglyceride lipase                                                                                           | MGLL   | 33820  | 0,25  | D7    | 0,50  |      |
|                                                                                                                |        |        |       |       |       |      |
| <b>(6) Transmembrane proteins</b>                                                                              |        |        |       |       |       |      |
| 4F2 cell-surface antigen heavy chain CD98                                                                      | 4F2    | 58150  | 2,39  | 2,78  | 2,00  | 1,85 |
| Aquaporin-1                                                                                                    | AQP1   | 29066  | 1,51  | 1,20  | 1,82  | 1,72 |
| Cation-dependent mannose-6-phosphate receptor                                                                  | MPRD   | 31589  | 2,17  | 3,20  | 1,14  | D2   |
| Chloride channel protein 2                                                                                     | CLCN2  | 100177 | 8,89  | 11,50 | 6,28  | D2   |
| H(+)/Cl(-) exchange transporter 3                                                                              | CLCN3  | 85419  | D2    | D2    | D2    | D2   |
| H(+)/Cl(-) exchange transporter 5                                                                              | CLCN5  | 83068  | D2    | D2    | D2    |      |
| Putative uncharacterized protein Clcn6                                                                         | D4A3H5 | 98352  | D2    | D2    | D2    |      |
| H(+)/Cl(-) exchange transporter 7                                                                              | P51799 | 88731  | D2    | D2    | D2    |      |
| Interferon-inducible protein                                                                                   | INIB   | 15132  | D2    | D2    | D2    |      |
| L-type amino acid transporter 1                                                                                | LAT1   | 56551  | 2,11  | 2,81  | 1,40  | 2,22 |
| Integrin-associated protein, CD47                                                                              | D4A1U9 | 33487  | 2,28  | 2,22  | 2,34  | 5,67 |
| Leukocyte sialoglycoprotein, CD43                                                                              | LEUK   | 38402  | 4,32  | 3,75  | 4,88  | D2   |
| Monocarboxylate transporter 1                                                                                  | MOT1   | 53831  | 1,37  | 1,48  | 1,26  | 2,47 |
| Monocarboxylate transporter 10                                                                                 | MOT10  | 56368  | 6,61  | 9,50  | 3,71  | D2   |
| Metal ion transporter DCT1                                                                                     | NRAM2  | 62807  | 16,03 | 26,50 | 5,56  | D2   |
| Voltage-dependent anion-selective channel protein 3                                                            | VDAC3  | 31178  | 5,50  | 8,00  | 3,01  | D2   |
| Voltage-dependent anion-selective channel protein 2                                                            | VDAC2  | 32353  | 3,63  | 3,00  | 4,25  |      |
| Voltage-dependent anion-selective channel protein 1                                                            | VDAC1  | 30851  | 4,08  | 5,75  | 2,41  | 8,03 |
| Two pore calcium channel protein 1                                                                             | TPC1   | 94800  | 25,12 | D2    | 25,12 | D2   |
| Intermediate conductance calcium-activated potassium channel protein 4 (KCCN4)                                 | Q9QYW1 | 48305  | D2    | D2    | D2    |      |
| Intermediate conductance K channel isoform 4b (Kcnn4)                                                          | A1A5N3 | 47639  | D2    | D2    | D2    |      |

|                                                                             |        |        |       |       |       |       |
|-----------------------------------------------------------------------------|--------|--------|-------|-------|-------|-------|
| Putative uncharacterized protein Ttyh3                                      | D3ZP76 | 52626  | 25,00 | D2    | 25,00 |       |
| Divalent cation transporter 1                                               | O54902 | 62277  | 16,01 | 26,50 | 5,53  |       |
| Solute carrier family 2, facilitated glucose transporter member 3           | GTR3   | 54002  | D2    |       | D7    | D2    |
| Solute carrier family 2, facilitated glucose transporter member 4           | GTR4   | 54896  | D2    | D2    | D2    |       |
| Putative uncharacterized protein Slc2a6                                     | D3ZLC4 | 55101  | D2    | D2    | D2    |       |
| Transporter Slc6a9                                                          | D4ABA4 | 70216  | 38,54 | D2    | 38,54 |       |
| Ecotropic retrovirus receptor                                               | Q8VIA9 | 68138  | 2,01  | 2,36  | 1,65  |       |
| Solute carrier family 12 member 4 (KCC1)                                    | S12A4  | 121690 | D2    | D2    | D2    | D2    |
| Urea transporter Slc14a1                                                    | P70633 | 45214  | 2,58  | 2,90  | 2,26  |       |
| Solute carrier family 15 member 4                                           | S15A4  | 61949  | D2    | D2    | D2    |       |
| Solute carrier family 22 member 4                                           | Q9R141 | 62362  | D2    | D2    | D2    |       |
| Solute carrier family 40 member 1                                           | S40A1  | 63286  | 2,54  | 3,75  | 1,33  |       |
| Putative uncharacterized protein Slc30a10                                   | D3ZJB7 | 50970  | 2,00  | 2,00  | D2    |       |
| Na <sup>+</sup> -dependent neutral amino acid transporter, ASCT2 (member 5) | Q9Z1D7 | 57630  | 2,67  | 2,73  | 2,60  | 2,55  |
| Sodium-coupled neutral amino acid transporter 5                             | A2VCW5 | 52436  | D2    | D2    | D2    |       |
| Na <sup>+</sup> /K <sup>+</sup> -transporting ATPase subunit alpha-1        | AT1A1  | 114293 | 3,05  | 3,50  | 2,59  | D2    |
| Na <sup>+</sup> /K <sup>+</sup> -transporting ATPase subunit beta-3         | AT1B3  | 32151  | 2,59  | 2,75  | 2,43  |       |
| Sodium- and chloride-dependent glycine transporter 1                        | D4ABA4 | 71493  | 38,73 | D2    | 38,73 | D2    |
| Sodium-dependent phosphate transporter 1                                    | Q9JJP0 | 74187  | D2    | D2    | D2    |       |
| ATP-binding cassette sub-family G member 2                                  | Q80W57 | 72961  | 5,42  | 6,50  | 4,34  |       |
| Progressive ankylosis protein homolog                                       | D3ZNG7 | 54304  | 12,92 | 10,67 | 15,18 | D2    |
| Plasma membrane calcium-transporting ATPase 4                               | AT2B4  | 134094 | 5,11  | 6,23  | 3,98  | D2    |
| Copper-transporting ATPase 2                                                | D3ZZB4 | 157431 | 2,97  | 3,35  | 2,59  |       |
| Band 3 anion transport protein (Slc4a1)                                     | Q5U329 | 103392 | 0,78  | 0,93  | 0,62  | 0,98  |
| Cd36 protein                                                                | Q5BKE5 | 53559  | 2,68  | 2,37  | 3,00  | 3,76  |
| Platelet glycoprotein 4 Cd36                                                | CD36   | 53268  | 2,62  | 2,37  | 2,86  |       |
| Putative uncharacterized protein Cd44                                       | D3Z9C5 | 67923  | 3,93  | D2    | 3,93  | D2    |
| CD48 antigen                                                                | CD48   | 27890  | 2,20  | 2,20  | D2    | D2    |
| CD55                                                                        | A9CMA5 | 41019  | 0,84  | 0,43  | 1,25  |       |
| CD59 glycoprotein                                                           | CD59   | 14465  | 1,28  | 1,50  | 1,07  | 1,20  |
| Embigin                                                                     | EMB    | 37438  | 1,66  | 1,61  | 1,71  | 1,44  |
| Basigin (CD147, OX47 antigen)                                               | P26453 | 42865  | 2,84  | 2,54  | 3,14  | D2    |
| Lman2 protein                                                               | B0BNG3 | 40709  | D2    | D2    | D2    | D2    |
| Nicastrin                                                                   | NICA   | 79035  | 3,07  | 3,40  | 2,75  | D2    |
| Rh blood group protein                                                      | RHD    | 46952  | 0,88  | 0,72  | 1,04  | 0,50  |
| Ammonium transporter Rh type A                                              | RHAG   | 49258  | 0,81  | 0,65  | 0,96  |       |
| Putative uncharacterized protein Ermap                                      | D3Z9R6 | 53769  | 2,56  | 3,38  | 1,74  |       |
| Putative uncharacterized protein Frrs1                                      | D4A8Z3 | 67063  | D2    | D2    | D2    |       |
| Atp11b protein (Fragment)                                                   | Q5RJS7 | 21487  | D2    | D2    | D2    |       |
| Putative uncharacterized protein Sppl2a                                     | D3ZNG3 | 58905  | 4,25  | 4,25  | D2    |       |
| Putative uncharacterized protein Atp6v1a                                    | D4A133 | 68563  | 2,59  | 2,44  | 2,75  |       |
| Putative uncharacterized protein Atp6v1h                                    | D3ZW96 | 56346  | 2,67  | 2,67  | 2,67  |       |
| V-type proton ATPase subunit B                                              | VATB2  | 56857  | 2,32  | 2,78  | 1,86  | D2    |
| V-type proton ATPase subunit C 1                                            | VATC1  | 44044  | 5,50  | 4,60  | 6,40  | D2    |
| ATPase, H <sup>+</sup> transporting, V1 subunit D                           | Q6P503 | 28291  | 4,21  | 7,00  | 1,43  |       |
| V-type proton ATPase subunit E 1                                            | VATE1  | 26169  | 5,36  | 7,00  | 3,72  | D2    |
| V-type proton ATPase 116 kDa subunit a isoform 1                            | VPP1   | 97063  | 7,03  | 7,03  |       | 20,83 |
| V-H+ATPase subunit a1-III                                                   | Q2I6B2 | 96321  | 5,52  | 7,14  | 3,90  | 15,20 |
| V-H+ATPase subunit a3                                                       | Q2I6B0 | 93850  | D2    | D2    | D2    | D2    |
| Putative uncharacterized protein 682925                                     | D4A3X6 | 115106 | D2    | D2    | D2    |       |
| Transmembrane protein 206                                                   | TM206  | 40333  | 14,00 | 14,00 | D2    | D2    |
| Apolipoprotein B-100                                                        | APOB   | 537740 | 4,87  | 1,71  | 8,02  | D2    |
| Disintegrin and metalloproteinase domain-containing protein 10 (Fragment)   | ADA10  | 62401  | 8,46  | 11,25 | 5,67  |       |
| Complement regulatory protein Crry                                          | CRRY   | 63407  | 8,50  | 7,00  | 10,00 |       |
| Putative uncharacterized protein Tmem9b                                     | D3ZUR2 | 22639  | D2    | D2    | D2    |       |
| Putative uncharacterized protein Tmem30a                                    | D3ZYA3 | 41411  | D2    | D2    | D2    | D2    |
| Integral membrane protein 2B                                                | ITM2B  | 30808  | D2    | D2    | D2    |       |
| Major prion protein                                                         | P13852 | 27804  | D2    | D2    | D2    |       |
| Leucine-rich repeat-containing protein 8C                                   | Q498T9 | 93372  | D2    | D2    | D2    |       |
| Leucine-rich repeat-containing protein 8D                                   | Q5U308 | 97940  | D2    | D2    | D2    |       |
| Putative uncharacterized protein Nptn                                       | NPTN   | 31501  | D2    | D2    | D2    |       |
| Neuropilin-1                                                                | NRP1   | 104271 | 10,07 | D2    | 10,07 |       |
| Podocalyxin                                                                 | PODXL  | 52026  | 2,95  | 3,60  | 2,30  | D2    |
| Insulin receptor                                                            | P15127 | 156757 | D2    | D2    | D2    |       |
| Transmembrane 9 superfamily member 2                                        | TM9S2  | 76620  | 7,27  | 6,00  | 8,55  | D2    |
| Osteopetrosis associated transmembrane protein 1                            | Q4QQU9 | 37910  | D2    | D2    | D2    | D2    |
| Putative uncharacterized protein Scamp2                                     | D3ZHT9 | 37330  | 2,00  | D2    | 2,00  |       |
| Putative uncharacterized protein Scamp3                                     | D3ZQ93 | 34830  | 13,33 | 21,00 | 5,67  | D2    |
| Flotillin-1                                                                 | FLOT1  | 47755  | 1,34  | 1,85  | 0,83  |       |
| Flotillin-2                                                                 | FLOT2  | 47408  | 1,06  | 1,38  | 0,74  |       |
| Putative uncharacterized protein ENSRNOP0000043743                          | D3Z841 | 52597  | D2    | D2    | D2    |       |
| Serine incorporator 3                                                       | Q5U2V2 | 52321  | D2    | D2    | D2    |       |
| Adiponectin receptor 1                                                      | Q6P746 | 42466  | D2    | D2    | D2    |       |

|                                                                                     |        |        |       |       |       |      |
|-------------------------------------------------------------------------------------|--------|--------|-------|-------|-------|------|
| Sema4b protein (Fragment)                                                           | Q4KM50 | 79479  | D2    | D2    | D2    |      |
| Disrupted in renal carcinoma protein 2 homolog                                      | Q66H95 | 52030  | D2    | D2    | D2    |      |
| Putative uncharacterized protein Abcc10                                             | D3ZX04 | 163822 | D2    | D2    | D2    |      |
| Transmembrane protein 127                                                           | A2RRU2 | 25858  | D2    | D2    | D2    |      |
| Putative uncharacterized protein Tmem189                                            | D3ZFY8 | 16458  | 1,61  | 1,63  | 1,60  |      |
| Osteopetrosis associated transmembrane protein 1                                    | Q4QQU9 | 37910  | D2    | D2    | D2    |      |
| Coxsackievirus and adenovirus receptor homolog                                      | Q9R066 | 39949  | D2    | D2    | D2    |      |
| Putative uncharacterized protein Enpp4                                              | D3ZVW8 | 44257  | D2    | D2    | D2    |      |
| Leucyl-cystinyl aminopeptidase                                                      | P97629 | 117202 | D2    | D2    | D2    |      |
| Transmembrane protein 184A                                                          | Q4QQS1 | 46878  | D2    | D2    | D2    |      |
| Transmembrane protein 106B                                                          | Q6AYA5 | 31152  | 3,00  | D2    | 3,00  |      |
| Disintegrin and metalloproteinase domain-containing protein 10 (Fragment) (ADAM 10) | Q10743 | 60445  | 8,58  | 11,25 | 5,90  |      |
| Putative uncharacterized protein Frrs1                                              | D4A8Z3 | 66308  | D2    | D2    | D2    |      |
| STARD3 N-terminal like                                                              | Q5U205 | 26719  | D2    | D2    | D2    |      |
| Complement regulatory protein Crry                                                  | Q63135 | 61680  | 8,71  | 7,00  | 10,42 |      |
| Putative uncharacterized protein Sspl2a                                             | D3ZNG3 | 57917  | 4,25  | 4,25  | D2    |      |
| Putative uncharacterized protein Sidt2                                              | D3ZEH5 | 94454  | D2    | D2    | D2    |      |
| Myeloid-associated differentiation marker                                           | Q6VBQ5 | 35148  | 3,47  | D2    | 3,47  |      |
| Presenilin-2                                                                        | O88777 | 50051  | D2    | D2    | D2    |      |
| Multidrug resistance-associated protein 4 splice variant                            | Q6QMG5 | 144430 | D2    | D2    | D2    |      |
| Sn1-specific diacylglycerol lipase beta                                             | P0C1S9 | 73771  | D2    | D2    | D2    |      |
| Putative uncharacterized protein Lrig1                                              | D3ZD84 | 107876 | 3,21  | D2    | 3,21  |      |
| Choline transporter-like protein 1                                                  | CTL1   | 74582  | 2,03  | 2,55  | 1,51  | D2   |
| Transmembrane emp24 protein transport domain containing 9                           | Q5I0E7 | 27182  | 3,33  | D2    | 3,33  |      |
| <b>(7) Iron and Globins</b>                                                         |        |        |       |       |       |      |
| Alpha globin                                                                        | Q63910 | 15572  | 0,44  | 0,37  | 0,52  | 0,14 |
| Epsilon 1 globin (Hemoglobin, epsilon 1)                                            | O88752 | 16151  | 0,73  | D7    | 0,73  | D7   |
| Hemoglobin subunit alpha-1/2                                                        | HBA    | 15490  | 0,66  | 0,70  | 0,62  | 0,82 |
| Zero beta-1 globin                                                                  | Q62669 | 16069  | 0,39  | 0,35  | 0,42  | 0,25 |
| Beta Glo                                                                            | Q6PDU6 | 16084  | 0,47  | 0,47  | 0,48  | 0,31 |
| Hemoglobin subunit beta-1                                                           | HBB1   | 16083  | 0,60  | 0,59  | 0,61  | 0,46 |
| Hemoglobin subunit beta-2                                                           | HBB2   | 16086  | 0,59  | 0,58  | 0,60  | 0,48 |
| Metalloreductase STEAP3                                                             | STEAP3 | 55095  | 14,16 | 21,27 | 7,04  | D2   |
| Putative uncharacterized protein Rfesd                                              | D3ZF58 | 17557  | D7    | D7    | D7    |      |
| Uroporphyrinogen III synthase                                                       | Q5XIF2 | 28439  | D7    | D7    | D7    |      |
| Uroporphyrinogen decarboxylase                                                      | B0BN55 | 40842  | 0,35  | 0,22  | 0,47  | 0,02 |
| Transferrin receptor protein 1 (Fragment) (CD 71)                                   | TFR1   | 70337  | 5,73  | 4,33  | 7,13  | 4,62 |
| Biliverdin reductase A                                                              | Q6AZ33 | 33658  | 0,30  | 0,11  | 0,49  | D7   |
| Biliverdin reductase B (Flavin reductase (NADPH)) (Predicted), isoform CRA_b)       | B5DF65 | 22194  | 0,23  | 0,19  | 0,27  | 0,08 |
| Putative uncharacterized protein Mpo                                                | D4A856 | 80883  | 2,86  | D2    | 2,86  |      |
| Eosinophil peroxidase (Predicted)                                                   | D3ZSY4 | 81281  | 2,53  | 2,33  | 2,73  |      |
| Hebp1 protein                                                                       | B4F7C7 | 21124  | D7    | D7    | D7    |      |
| Ferrochelatase                                                                      | D3ZBM3 | 48091  | 0,78  | 0,96  | 0,60  |      |
| Ferritin light chain 1                                                              | FRIL1  | 20793  | 1,20  | 1,32  | 1,07  |      |
| Ferritin heavy chain                                                                | FRIH   | 21284  | 1,15  | 1,55  | 0,76  |      |
| <b>(8) MVB biogenesis</b>                                                           |        |        |       |       |       |      |
| Alix                                                                                | PDC6I  | 97141  | 1,57  | 1,75  | 1,38  | D2   |
| BRO1 domain-containing protein BROX                                                 | BROX   | 46676  | 4,69  | 6,00  | 3,39  |      |
| <b>ESCRT0</b>                                                                       |        |        |       |       |       |      |
| SNAP-25-interacting protein Hrs-2                                                   | HGS    | 86819  | 0,32  | 0,55  | 0,08  |      |
| Epidermal growth factor receptor pathway substrate 15 isoform B                     | Q5JC29 | 87189  | D7    | D7    | D7    |      |
| Putative uncharacterized protein Stam                                               | D3ZI37 | 54890  | 0,22  | 0,38  | 0,05  |      |
| <b>ESCRTI</b>                                                                       |        |        |       |       |       |      |
| Tumor susceptibility gene 101 protein                                               | TS101  | 44221  | 1,00  |       | 1,00  |      |
| <b>ESCRTII</b>                                                                      |        |        |       |       |       |      |
| <b>ESCRTIII</b>                                                                     |        |        |       |       |       |      |
| Putative uncharacterized protein Chmp4b                                             | D4A9Z8 | 25094  | 1,38  | 1,75  | 1,00  |      |
| IST1 homolog                                                                        | IST1   | 40088  | 2,75  | D2    | 2,75  |      |
| Vacuolar protein sorting-associated protein 4A                                      | VPS4A  | 49161  | 1,00  | D2    | 1,00  |      |
| <b>(9) Signalling proteins</b>                                                      |        |        |       |       |       |      |
| Major vault protein                                                                 | Q62667 | 96081  | 0,39  | 0,34  | 0,44  | 0,21 |
| <b>14-3-3 proteins</b>                                                              |        |        |       |       |       |      |
| epsilon                                                                             | 1433E  | 29326  | 0,73  | 0,33  | 1,13  | 1,14 |
| eta                                                                                 | 1433F  | 28365  | 0,86  | 0,83  | 0,88  | D2   |
| gamma                                                                               | 1433G  | 28455  | 0,66  | 0,44  | 0,88  |      |
| zeta/delta                                                                          | 1433Z  | 27925  | 1,20  | 0,75  | 1,65  | 3,33 |
| Rho, GDP dissociation inhibitor (GDI) beta                                          | Q5M860 | 22927  | D2    | D2    | D2    | D2   |
| GTPase-activating protein and VPS9 domain-containing protein 1                      | D3ZBJ3 | 162466 | D7    | D7    | D7    |      |

|                                                          |        |        |      |      |      |      |
|----------------------------------------------------------|--------|--------|------|------|------|------|
| GTP binding protein 1 (Predicted), isoform CRA_a         | D2XV59 | 72489  | D7   | D7   | D7   |      |
| Syntenin-1                                               | SDCB1  | 32631  | 6,16 | 6,11 | 6,20 | D2   |
| Transforming protein RhoA                                | RHOA   | 22110  | 1,04 | 0,76 | 1,32 | D7   |
| Ras homolog gene family, member G, RhoG                  | Q32PX6 | 21309  | 2,08 | D2   | 2,08 |      |
| RhoA activator C11orf59 homolog                          | Q6P791 | 17824  | 3,61 | 4,50 | 2,72 | D2   |
| <b>Guanine nucleotide-binding protein</b>                |        |        |      |      |      |      |
| G(i), alpha-2 subunit                                    | GNAI2  | 41043  | 2,52 | 3,17 | 1,88 |      |
| G(l)/G(S)/G(T) beta-2                                    | GBB2   | 38048  | 1,17 | 1,40 | 0,95 |      |
| beta-2-like 1                                            | GBLP   | 35510  | 1,23 | 1,07 | 1,38 |      |
| Kinase D-interacting substrate of 220 kDa = ARMS         | KDIS   | 197247 | D2   | D2   | D2   | D2   |
| Cell cycle control protein 50A                           | CC50A  | 37263  | D2   | D2   |      | D2   |
| Cell division control protein 42 homolog                 | CDC42  | 21587  | 0,76 | 0,67 | 0,86 | 0,40 |
| <b>(10) Tetraspanins</b>                                 |        |        |      |      |      |      |
| Tetraspanin-5                                            | Q68VK5 | 30337  | D2   | D2   | D2   |      |
| D6.1A protein (Tetraspanin 8)                            | O55158 | 26212  | 2,79 | 4,00 | 1,58 | 4,25 |
| Putative uncharacterized protein Tspan14                 | D4A0Z1 | 30702  | 5,21 | D2   | 5,21 |      |
| CD9 molecule                                             | B1WBM0 | 25768  | 2,44 | D2   | 2,44 | D2   |
| CD81 molecule                                            | Q6P9V1 | 26571  | D2   |      | D2   |      |
| CD82                                                     | Q6IN14 | 30081  | 1,80 | 1,73 | 1,87 | 3,00 |
| <b>(11) Transcription and protein synthesis</b>          |        |        |      |      |      |      |
| <b>Histones</b>                                          |        |        |      |      |      |      |
| Histone 1, H1a (Predicted)                               | D4A3K5 | 22004  | D2   | D2   | D2   |      |
| Putative uncharacterized protein Hist1h1b                | D3ZBN0 | 22649  | D2   | D2   | D2   |      |
| Histone H1.2                                             | H12    | 21974  | 4,40 | 5,33 | 3,48 | D2   |
| Histone H2A                                              | D3ZXP3 | 15115  | 1,18 | D2   | 1,18 |      |
| H2A type 1                                               | H2A1   | 14068  | 3,47 | 6,15 | 0,78 | 2,08 |
| Core histone macro-H2A.1                                 | H2AY   | 39650  | D2   | D2   | D2   |      |
| H2A.Z                                                    | H2AZ   | 13545  | 2,12 | D2   | 2,12 | D2   |
| H2B                                                      | D3ZNH4 | 13982  | 0,55 | 0,42 | 0,68 | 4,00 |
| Histone H3                                               | D3ZJ08 | 15388  | 2,35 | 1,57 | 3,13 |      |
| H3.1                                                     | H31    | 15509  | 2,35 | D7   | 2,35 | 2,35 |
| H4                                                       | H4     | 11360  | 2,54 | 2,30 | 2,78 | 2,40 |
| Putative uncharacterized protein (NAP-1-related protein) | Q6P769 | 45602  | 0,20 | 0,11 | 0,28 | D7   |
| Condensin complex subunit 1                              | D3ZHP6 | 155590 | 0,12 | D7   | 0,25 |      |
| Thyroid receptor-interacting protein 13                  | Q5XHZ9 | 48434  | 0,07 | D7   | 0,15 |      |
| DNA damage-binding protein 1                             | Q9ESW0 | 126862 | D7   | D7   | D7   |      |
| Nucleosome assembly protein 1-like 4                     | NP1L4  | 44118  | D7   | D7   | D7   |      |
| Putative uncharacterized protein Hdac6                   | D3ZVD8 | 21876  | D7   | D7   | D7   |      |
| Putative uncharacterized protein Dhx9                    | D3Z9Q9 | 151358 | 0,58 | 0,23 | 0,93 |      |
| BRCA1-A complex subunit BRE                              | BRE    | 43987  | 0,50 | D7   | 0,50 |      |
| Da2-35                                                   | Q7TP02 | 31827  | D7   | D7   | D7   |      |
| <b>Ribosomal proteins</b>                                |        |        |      |      |      |      |
| Small nuclear ribonucleoprotein D1                       | B2RZB7 | 13282  | D2   | D2   | D2   |      |
| Putative uncharacterized protein RGD1561333              | D4A6W6 | 28367  | 3,21 | 2,50 | 3,93 | D2   |
| Rpl14 protein (RCG25732, isoform CRA_b)                  | B5DEM5 | 23879  | 2,96 | 3,50 | 2,42 | D2   |
| Rpl7 protein (RCG30479, isoform CRA_b)                   | B0K031 | 30351  | 4,24 | 3,25 | 5,23 | D2   |
| Rps16 protein (Fragment)                                 | B0K038 | 18074  | 4,55 | 5,50 | 3,61 | D2   |
| Putative uncharacterized protein Rps11                   | D3ZE37 | 18917  | 2,03 | 1,33 | 2,72 |      |
| 40S ribosomal protein S4, X isoform                      | RS4X   | 29807  | 1,58 | 1,11 | 2,05 |      |
| Ribosomal protein S5, isoform CRA_b                      | B0BN81 | 23063  | 1,67 | 1,11 | 2,22 |      |
| 40S ribosomal protein S6                                 | RS6    | 28834  | 2,60 | 2,17 | 3,02 | D2   |
| Ribosomal protein S8                                     | B2RYR8 | 24475  | 3,29 | 1,44 | 5,14 |      |
| 40S ribosomal protein S9                                 | RS9    | 22634  | 3,93 | D2   | 3,93 | D2   |
| 40S ribosomal protein S10                                | RS10   | 18904  | 1,60 | 2,00 | 1,20 | 1,00 |
| 40S ribosomal protein S11                                | RS11   | 18590  | 1,97 | 1,33 | 2,60 | 3,00 |
| 40S ribosomal protein S12                                | RS12   | 14858  | 3,13 | D2   | 3,13 |      |
| 40S ribosomal protein S13                                | RS13   | 17212  | 0,75 | D2   | 0,75 | 5,00 |
| 40S ribosomal protein S15a                               | P62246 | 14840  | D2   | D2   | D2   |      |
| 40S ribosomal protein S2                                 | RS2    | 31497  | 2,42 | 1,95 | 2,89 | D2   |
| 40S ribosomal protein S23                                | RS23   | 15969  | 5,23 | D2   | 5,23 | D2   |
| 40S ribosomal protein S24                                | D4A6H5 | 15197  | D2   | D2   | D2   |      |
| 40S ribosomal protein S25                                | RS25   | 13791  | 1,00 | D2   | 1,00 |      |
| 40S ribosomal protein S26                                | RS26   | 13292  | 1,85 | 1,33 | 2,38 | 1,00 |
| 40S ribosomal protein S3                                 | RS3    | 26828  | 1,86 | D2   | 1,86 | D2   |
| 40S ribosomal protein S3a                                | RS3A   | 30154  | 2,53 | 3,00 | 2,05 |      |
| 40S ribosomal protein SA                                 | RSSA   | 32917  | 2,02 | 1,83 | 2,21 | 3,00 |
| 60S acidic ribosomal protein P0                          | RLA0   | 34365  | 0,66 | 0,61 | 0,70 | 0,50 |
| 60S acidic ribosomal protein P1                          | RLA1   | 11605  | 0,50 | 0,75 | 0,25 | D7   |
| 60S ribosomal protein L10                                | Q6PDV7 | 24604  | 2,00 | 2,00 | D2   |      |
| 60S ribosomal protein L10a                               | RL10A  | 24986  | 1,39 | 1,00 | 1,77 |      |
| 60S ribosomal protein L11                                | RL11   | 20468  | 1,85 | 2,33 | 1,38 |      |
| RCG45615, isoform CRA_a                                  | B2RYU2 | 18005  | 0,64 | 0,40 | 0,88 |      |

|                                                                         |        |        |       |       |       |      |
|-------------------------------------------------------------------------|--------|--------|-------|-------|-------|------|
| 60S ribosomal protein L13                                               | RL13   | 24351  | 2,47  | 2,00  | 2,93  | D2   |
| Ribosomal protein L13A                                                  | Q5RK10 | 23545  | 9,55  | D2    | 9,55  |      |
| 60S ribosomal protein L15                                               | RL15   | 24245  | 6,11  | 6,50  | 5,72  | D2   |
| Putative uncharacterized protein RGD1562402                             | D3ZF07 | 16587  | 6,25  | D2    | 6,25  |      |
| 60S ribosomal protein L17                                               | RL17   | 21611  | 3,78  | 2,00  | 5,56  | 2,00 |
| 60S ribosomal protein L18                                               | RL18   | 21702  | 6,01  | 2,43  | 9,60  | D2   |
| 60S ribosomal protein L18a                                              | RL18A  | 21004  | 2,43  | 1,60  | 3,25  |      |
| 60S ribosomal protein L19                                               | RL19   | 23565  | 9,07  | D2    | 9,07  | D2   |
| 60S ribosomal protein L23 (RL23P)                                       | D3ZTH8 | 14970  | D2    | D2    | D2    | D2   |
| 60S ribosomal protein L24                                               | RL24   | 17779  | D2    | D2    | D2    |      |
| 60S ribosomal protein L26                                               | RL26   | 17277  | 8,96  | D2    | 8,96  |      |
| 60S ribosomal protein L27                                               | RL27   | 15788  | 3,84  | D2    | 3,84  | D2   |
| 60S ribosomal protein L3                                                | RL3    | 46392  | 4,76  | 2,94  | 6,57  |      |
| 60S ribosomal protein L30                                               | RL30   | 12947  | 2,44  | D2    | 2,44  | D2   |
| 60S ribosomal protein L32                                               | RL32   | 15860  | D2    | D2    | D2    |      |
| 60S ribosomal protein L37a                                              | P61515 | 10275  | D2    | D2    | D2    |      |
| 60S ribosomal protein L5                                                | RL5    | 34665  | 5,26  | 5,14  | 5,37  |      |
| Ribosomal protein L4                                                    | Q6P3V9 | 47556  | 11,50 | 12,50 | 10,50 |      |
| 60S ribosomal protein L6 (Fragment)                                     | D4ADN2 | 33510  | 3,60  | 4,83  | 2,38  | D2   |
| Putative uncharacterized protein ENSRNOP0000046090                      | D3ZM33 | 17787  | 2,44  | D2    | 2,44  | D2   |
| Putative uncharacterized protein ENSRNOP0000044275                      | D3ZX87 | 14263  | 2,78  | D2    | 2,78  |      |
| Heterogeneous nuclear ribonucleoprotein K                               | P61980 | 50976  | 0,22  | D7    | 0,45  |      |
| Polyadenylate-binding protein 1                                         | PABP1  | 70883  | D7    | D7    | D7    |      |
| ATP-binding cassette sub-family F member 1                              | ABCF1  | 95649  | D7    | D7    | D7    |      |
| Probable tRNA(His) guanylyltransferase                                  | THG1   | 35170  | D7    | D7    | D7    |      |
| <b>tRNAaminoacyl synthetases</b>                                        |        |        |       |       |       |      |
| Aspartyl-tRNA synthetase                                                | SYDC   | 57546  | 0,23  | 0,18  | 0,29  | D7   |
| Arginyl-tRNA synthetase                                                 | SYRC   | 76503  | 0,19  | 0,13  | 0,24  |      |
| Leucyl-tRNA synthetase                                                  | Q5PPJ6 | 135504 | 0,20  | 0,17  | 0,23  | D7   |
| Lysyl-tRNA synthetase                                                   | D4ABR8 | 72091  | 0,08  | D7    | 0,17  |      |
| Phenylalanyl-tRNA synthetase alpha chain                                | SYFA   | 57798  | 0,95  | 0,60  | 1,30  | 1,00 |
| Phenylalanyl-tRNA synthetase, beta subunit                              | Q68FT7 | 66294  | 0,30  | D7    | 0,60  |      |
| Seryl-tRNA synthetase, cytoplasmic                                      | SYSC   | 59064  | 0,27  | D7    | 0,55  | D7   |
| Tryptophanyl-tRNA synthetase, cytoplasmic                               | SYWC   | 54622  | 0,15  | D7    | 0,29  | D7   |
| Valyl-tRNA synthetase                                                   | SYVC   | 141535 | 0,19  | 0,06  | 0,32  | D7   |
| Glycyl-tRNA synthetase                                                  | SYG    | 72669  | 0,21  | D7    | 0,42  | D7   |
| glutamyl and prolyl-tRNA synthetase                                     | Q6TXE9 | 168558 | 0,13  | 0,05  | 0,20  | D7   |
| aspartyl- asparaginy-tRNA synthetase                                    | Q6TUD1 | 57975  | 0,13  | D7    | 0,26  | D7   |
| Histidyl-tRNA synthetase                                                | Q4QQV4 | 57780  | D7    | D7    | D7    |      |
| lars protein (Fragment) isoleucine-tRNA synthetase activity             | Q5BJR3 | 31490  | 0,12  | D7    | 0,23  |      |
| Glutamyl-tRNA synthetase                                                | Q66H61 | 88557  | 0,19  | D7    | 0,39  |      |
| Alanyl-tRNA synthetase, cytoplasmic                                     | SYAC   | 69001  | 0,18  | 0,07  | 0,29  | D7   |
| Threonyl-tRNA synthetase, cytoplasmic                                   | D3ZHY1 | 81437  | 0,12  | D7    | 0,25  |      |
| Tyrosyl-tRNA synthetase, cytoplasmic                                    | SYYC   | 59420  | D7    | D7    | D7    |      |
| Putative uncharacterized protein Mars (Methionyl-tRNA synthetase)       | D3Z941 | 102772 | 0,12  | D7    | 0,23  |      |
| Aminoacyl tRNA synthetase complex-interacting multifunctional protein 2 | AIMP2  | 35705  | 0,20  | 0,14  | 0,26  | D7   |
| <b>Elongation factors (EF)</b>                                          |        |        |       |       |       |      |
| EF 1-alpha 1                                                            | EF1A1  | 50424  | 0,81  | 0,90  | 0,72  | 0,27 |
| EF 1-gamma                                                              | EF1G   | 50371  | 0,25  | 0,15  | 0,36  | 0,04 |
| EF 1 beta 2 (RCG22471, isoform CRA_b)                                   | B5DEN5 | 24831  | 0,19  | 0,20  | 0,17  | D7   |
| EF 1-delta                                                              | Q68FR9 | 72653  | 0,12  | D7    | 0,23  | D7   |
| Eukaryotic translation elongation factor 1 epsilon 1                    | B2RYN3 | 19887  | 0,20  | D7    | 0,40  |      |
| EF 2                                                                    | EF2    | 96192  | 0,55  | 0,47  | 0,64  | 0,26 |
| <b>Release factors (RF)</b>                                             |        |        |       |       |       |      |
| Eukaryotic peptide chain release factor subunit 1                       | Q5U2Q7 | 49031  | D7    | D7    | D7    |      |
| <b>Initiation factors (IF)</b>                                          |        |        |       |       |       |      |
| Eukaryotic IF 4A-II                                                     | IF4A2  | 46601  | D7    | D7    | D7    | 0,20 |
| Eukaryotic translation IF 2 subunit 1                                   | IF2A   | 36371  | 0,34  | 0,17  | 0,50  | D7   |
| Eukaryotic translation initiation factor 2A, isoform CRA_b              | D3ZUV3 | 64379  | D7    | D7    | D7    |      |
| Eukaryotic translation initiation factor 2-alpha kinase 1               | Q63185 | 69599  | D7    | D7    | D7    |      |
| Translation initiation factor eIF-2B subunit epsilon                    | E12BE  | 80898  | D7    | D7    | D7    |      |
| Eukaryotic translation initiation factor 2 subunit 3                    | IF2G   | 51617  | 0,19  | 0,04  | 0,34  |      |
| Eukaryotic translation IF 3                                             |        |        |       |       |       |      |
| subunit A                                                               | Q1JU68 | 163496 | 0,09  | D7    | 0,18  | D7   |
| subunit B                                                               | D3ZUK5 | 91253  | 0,10  | D7    | 0,21  | D7   |
| subunit C                                                               | EIF3C  |        | 0,08  | D7    | 0,15  |      |
| subunit D                                                               | EIF3D  | 64575  | 0,08  | D7    | 0,16  |      |
| subunit E                                                               | EIF3E  |        | 0,27  | 0,14  | 0,41  | D7   |
| subunit F                                                               | D4AC36 | 37997  | 0,20  | 0,17  | 0,24  |      |
| subunit G                                                               | EIF3G  | 35914  | 0,06  | D7    | 0,13  |      |
| subunit H                                                               | EIF3H  | 40051  | 0,10  | 0,09  | 0,10  | D7   |
| subunit I                                                               | EIF3I  | 36837  | 0,47  | 0,41  | 0,53  |      |
| subunit K                                                               | D3Z9H3 | 25115  | D7    | D7    | D7    |      |
| Eukaryotic translation IF 5A-1                                          | IF5A1  | 17049  | D7    | D7    | D7    |      |

|                                                                                    |        |        |      |      |      |      |
|------------------------------------------------------------------------------------|--------|--------|------|------|------|------|
| Eukaryotic translation initiation factor 5                                         | IF5    | 48954  | 0,07 | D7   | 0,15 |      |
| Eukaryotic translation initiation factor 4A1                                       | Q6P3V8 | 46352  | 0,68 | 0,52 | 0,83 |      |
| Putative uncharacterized protein Eif4g1                                            | D3ZU13 | 176394 | D7   | D7   | D7   |      |
| Eukaryotic translation initiation factor 4E                                        | IF4E   | 25266  | 0,21 | D7   | 0,42 |      |
| Eukaryotic translation initiation factor 6                                         | Q3KRD8 | 27067  | D7   | D7   | D7   |      |
| Eukaryotic translation initiation factor 3, subunit 6 interacting protein          | Q498D2 | 45281  | 0,22 | D7   | 0,44 | D7   |
| <b>Ubiquitine and proteasome</b>                                                   |        |        |      |      |      |      |
| Ubiquitin (Ub)                                                                     | UBIQ   | 8560   | 1,24 | 1,41 | 1,07 | 1,44 |
| Ub thioesterase OTU1                                                               | OTU1   | 37949  | 0,11 | 0,13 | 0,08 | D7   |
| Ubiquitin thioesterase OTUB1                                                       | OTUB1  | 31478  | D7   | D7   | D7   |      |
| Ubiquitin-like modifier-activating enzyme 1                                        | UBA1   | 118910 | 0,34 | 0,05 | 0,62 | 0,02 |
| Ubiquitin-like modifier-activating enzyme 5                                        | UBA5   | 44895  | D7   | D7   | D7   |      |
| Ub-associated domain-containing protein 1                                          | UBAC1  | 45746  | D7   | D7   | D7   | D7   |
| Ub-conjugating enzyme E2 N                                                         | UBE2N  | 17170  | 1,13 | D2   | 1,13 | D2   |
| Ubiquitin carrier protein                                                          | D3ZI82 | 19571  | D7   | D7   | D7   |      |
| Ubiquitin carrier protein                                                          | D3ZNQ6 | 21172  | D7   | D7   | D7   |      |
| E3 ubiquitin-protein ligase UBR4                                                   | D3ZZA2 | 580498 | 0,06 | D7   | 0,12 | D7   |
| E3 ubiquitin-protein ligase RNF123                                                 | D3ZXK7 | 149077 | 0,05 | D7   | 0,09 |      |
| WW domain containing E3 ubiquitin protein ligase 2                                 | B4F767 | 99286  | 8,68 | D2   | 8,68 |      |
| Cullin-associated NEDD8-dissociated protein 1                                      | CAND1  | 137985 | 0,07 | 0,04 | 0,11 | D7   |
| Transitional endoplasmic reticulum ATPase                                          | TERA   | 89977  | 0,28 | 0,16 | 0,40 | D7   |
| Ubiquitin carboxyl-terminal hydrolase                                              | Q9R085 | 110440 | D7   | D7   | D7   |      |
| Ubiquitin carboxyl-terminal hydrolase                                              | D3ZC84 | 289440 | 0,08 | D7   | 0,15 |      |
| Ubiquitin carboxyl-terminal hydrolase                                              | D3ZVQ0 | 95779  | D7   | D7   | D7   |      |
| Ubiquitin carboxyl-terminal hydrolase 7                                            | UBP7   | 129432 | D7   | D7   | D7   |      |
| Ubiquitin carboxyl-terminal hydrolase isozyme L3                                   | UCHL3  | 26278  | D7   | D7   | D7   |      |
| Nedd4l                                                                             | D7NIW0 | 51989  | D2   | D2   | D2   |      |
| Putative uncharacterized protein Stub1                                             | D4A4T0 | 35320  | D2   | D2   | D2   |      |
| Cullin-5                                                                           | CUL5   | 91403  | D7   | D7   | D7   |      |
| OTU domain, ubiquitin aldehyde binding 2 (Predicted), isoform CRA_a                | D3ZAR8 | 27258  | D7   | D7   | D7   |      |
| Lys-63-specific deubiquitinase BRCC36                                              | BRCC3  | 33451  | D7   | D7   | D7   |      |
| <b>26S proteasome</b>                                                              |        |        |      |      |      |      |
| 26S protease regulatory subunit 4                                                  | PRS4   | 49325  | 0,08 | D7   | 0,15 | D7   |
| 26S protease regulatory subunit 6A                                                 | PRS6A  | 49415  | 0,25 | 0,12 | 0,37 | D7   |
| 26S protease regulatory subunit 6B                                                 | PRS6B  | 47493  | 0,23 | 0,07 | 0,38 | D7   |
| 26S protease regulatory subunit 7                                                  | PRS7   | 48943  | 0,23 | 0,06 | 0,39 |      |
| 26S protease regulatory subunit 8                                                  | PRS8   | 45768  | 0,20 | 0,02 | 0,38 | D7   |
| Psmc6 protein (Fragment)                                                           | Q32PW9 | 43288  | 0,21 | 0,15 | 0,27 |      |
| Proteasome subunit alpha type                                                      | Q6P9V6 | 26411  | D7   | D7   | D7   |      |
| Proteasome subunit alpha type-2                                                    | PSA2   | 26024  | D7   | D7   | D7   |      |
| Proteasome subunit alpha type-6                                                    | PSA6   | 27399  | 0,09 | D7   | 0,17 |      |
| Proteasome subunit alpha type-7                                                    | PSA7   | 28326  | 0,13 | D7   | 0,26 |      |
| Proteasome subunit beta type-1                                                     | PSB1   | 26690  |      | D7   | D2   |      |
| Proteasome subunit beta type-2                                                     | PSB2   | 22912  | D7   | D7   | D7   |      |
| Proteasome subunit beta type-5                                                     | PSB5   | 28738  | D7   | D7   | D7   |      |
| <b>20S proteasome</b>                                                              |        |        |      |      |      |      |
| 26S proteasome non-ATPase regulatory subunit 1                                     | PSMD1  | 106707 | 0,09 | 0,04 | 0,14 | D7   |
| 26S proteasome non-ATPase regulatory subunit 2                                     | PSMD2  | 100922 | 0,18 | D7   | 0,37 | D7   |
| Putative uncharacterized protein Psm�4                                             | D4A9C9 | 39335  | D7   | D7   | D7   |      |
| 26S proteasome non-ATPase regulatory subunit 8                                     | Q3B8P5 | 32337  | 0,15 | D7   | 0,31 |      |
| Proteasome (Prosome, macropain) 26S subunit, non-ATPase, 11                        | B5DEP6 | 48280  | 0,23 | 0,11 | 0,35 | D7   |
| Proteasome (Prosome, macropain) 26S subunit, non-ATPase, 12                        | Q5XIC6 | 53302  | 0,13 | 0,03 | 0,24 |      |
| Proteasome (Prosome, macropain) 26S subunit, non-ATPase, 13 (Predicted)            | B0BN93 | 43075  | 0,16 | D7   | 0,33 |      |
| Proteasome (Prosome, macropain) 26S subunit, non-ATPase, 14                        | Q4V8E2 | 34577  | 0,05 | 0,10 | D7   |      |
| 26S proteasome non-ATPase regulatory subunit 13                                    | PSD13  | 43075  | 0,16 | D7   | 0,33 | D7   |
| Proteasome (macropain) 26S subunit, non-ATPase, 3                                  | Q5U2S7 | 60764  | 0,10 | D7   | 0,19 | D7   |
| Proteasome (Prosome, macropain) 26S subunit, non-ATPase, 5                         | B2RYP1 | 36962  | 0,32 | D7   | 0,55 |      |
| Proteasome (macropain) 26S subunit, non-ATPase, 6                                  | Q6PCT9 | 45854  | 0,24 | 0,12 | 0,36 | 0,07 |
| Proteasome (Prosome, macropain) 26S subunit, non-ATPase, 7 (Predicted)             | D4AEH3 | 36492  | 0,21 | 0,16 | 0,25 |      |
| Proteasome inhibitor PI31 subunit                                                  | PSMF1  | 30007  | 0,18 | D7   | 0,36 | D7   |
| Down syndrome critical region homolog 2 (Human) (Predicted), isoform CRA_b (Psmg1) | D4AAH6 | 33238  | D7   | D7   | D7   |      |
| Putative uncharacterized protein RGD1564425                                        | D3Z8J0 | 23316  | D7   | D7   | D7   |      |
| <b>COP9</b>                                                                        |        |        |      |      |      |      |
| COP9 signalosome complex subunit 2                                                 | CSN2   | 51597  | D7   | D7   | D7   |      |
| COP9 signalosome complex subunit 3                                                 | CSN3   | 48398  | 0,27 | 0,09 | 0,45 | D7   |
| COP9 signalosome complex subunit 4                                                 | CSN4   | 46546  | D7   | D7   | D7   |      |
| COP9 (Constitutive photomorphogenic) homolog, subunit 5                            | Q4KM69 | 37579  | D7   | D7   | D7   |      |
| Prolyl endopeptidase                                                               | PPCE   | 81659  | 0,18 | D7   | 0,36 |      |
| Tripeptidyl-peptidase 2                                                            | TPP2   | 139688 | 0,09 | 0,02 | 0,15 |      |
| Dipeptidyl peptidase 3                                                             | DPP3   | 83386  | 0,21 | D7   | 0,42 |      |
| Insulin-degrading enzyme                                                           | IDE    | 118376 | D7   | D7   | D7   |      |



| <b>(10) Trafficking and membrane fusion</b>                |                                         |        |        |       |       |      |      |
|------------------------------------------------------------|-----------------------------------------|--------|--------|-------|-------|------|------|
| Annexins                                                   |                                         |        |        |       |       |      |      |
|                                                            | A1                                      | ANXA1  | 38829  | 10,31 | 18,00 | 2,63 |      |
|                                                            | A2                                      | ANXA2  | 38938  | 6,02  | D2    | 6,02 | D2   |
|                                                            | A11                                     | Q5XI77 | 54468  | 6,53  | 5,33  | 7,73 | D2   |
|                                                            | Putative uncharacterized protein Anxa6  | D4ABR6 | 75511  | D2    | D2    | D2   | D2   |
| ARFs                                                       |                                         |        |        |       |       |      |      |
|                                                            | ADP-ribosylation factor 5               | ARF5   | 20631  | 1,42  | 1,35  | 1,49 | 0,83 |
|                                                            | ADP-ribosylation factor-like protein 8B | ARL8B  | 21753  | 1,13  | 1,40  | 0,86 |      |
| AP-1 complex subunit mu-1                                  |                                         |        |        |       |       |      |      |
|                                                            |                                         | AP1M1  | 105377 | 0,72  | 0,66  | 0,77 |      |
| AP-2 complex                                               |                                         |        |        |       |       |      |      |
|                                                            | Putative uncharacterized protein Ap2a1  | D3ZMB9 | 106468 | 0,53  | 0,61  | 0,45 |      |
|                                                            | subunit alpha-2                         | AP2A2  | 104891 | 0,64  | 0,68  | 0,60 |      |
|                                                            | subunit beta-1                          | AP2B1  | 105398 | 0,78  | 0,80  | 0,76 |      |
|                                                            | subunit mu-1                            | AP2M1  | 49965  | 0,64  | 0,52  | 0,76 |      |
|                                                            | subunit sigma-1                         | AP2S1  | 17177  | 0,29  | D7    | 0,57 |      |
| Clathrin heavy chain 1                                     |                                         |        |        |       |       |      |      |
|                                                            |                                         | CLH    | 193187 | 0,60  | 0,60  |      | 0,23 |
| Clta protein                                               |                                         |        |        |       |       |      |      |
|                                                            |                                         | Q5PPP1 | 23608  | 0,36  | 0,43  | 0,29 | 0,25 |
| Putative uncharacterized protein Cltc                      |                                         |        |        |       |       |      |      |
|                                                            |                                         | D4AD25 | 193666 | 0,55  | 0,58  | 0,51 |      |
| Enthoprotin                                                |                                         |        |        |       |       |      |      |
|                                                            |                                         | Q6DGF2 | 52222  | 0,32  | 0,44  | 0,19 | D7   |
| Synptojanin-1                                              |                                         |        |        |       |       |      |      |
|                                                            |                                         | SYNJ1  | 173970 | 0,08  | D7    | 0,17 |      |
| Rab GDP dissociation inhibitor                             |                                         |        |        |       |       |      |      |
|                                                            | beta                                    | GDIB   | 51018  | 0,53  | 0,50  | 0,55 | 0,25 |
| Ras related protein rab                                    |                                         |        |        |       |       |      |      |
|                                                            | 1A                                      | RAB1A  | 22891  | 1,56  | 1,45  | 1,67 | 3,78 |
|                                                            | 1B                                      | RAB1B  | 22320  | 1,23  | 1,27  | 1,20 |      |
|                                                            | 4A                                      | D4ADS8 | 24232  | 1,67  | D2    | 1,67 |      |
|                                                            | 4B                                      | P51146 | 23629  | 2,11  | 2,20  | 2,01 |      |
|                                                            | 5A, member RAS oncogene family          | O88565 | 23827  | 2,09  | 2,15  | 2,04 | 2,19 |
|                                                            | 5B                                      | A1L1J8 | 23887  | 1,95  | 2,27  | 1,63 | D2   |
|                                                            | 5c                                      | B0BNK1 | 23639  | 2,08  | 1,88  | 2,28 | D2   |
|                                                            | 6A                                      | D3ZGP4 | 23644  | 1,56  | 1,30  | 1,82 |      |
|                                                            | 7A                                      | RAB7A  | 23773  | 2,56  | 3,40  | 1,71 | D2   |
|                                                            | 8A                                      | RAB8A  | 23824  | 1,37  | 1,48  | 1,26 | 2,40 |
|                                                            | 8B                                      | RAB8B  | 23759  | 1,53  | 1,77  | 1,29 | D2   |
|                                                            | 9A                                      | RAB9A  | 23166  | 4,54  | D2    | 4,54 | D2   |
|                                                            | 10                                      | Q7TQ88 | 15561  | 1,52  | 1,70  | 1,34 | D2   |
|                                                            | 11B                                     | RB11B  | 24588  | 2,84  | 3,64  | 2,05 | 4,00 |
|                                                            | 14                                      | B0BMW0 | 24140  | 2,66  | 3,14  | 2,17 | 3,65 |
|                                                            | 18                                      | RAB18  | 23246  | 0,50  | 0,50  | 0,50 |      |
|                                                            | 21                                      | RAB21  | 24547  | 1,57  | 1,65  | 1,49 | 1,20 |
|                                                            | 35                                      | RAB35  | 23295  | 2,21  | D2    | 2,21 |      |
| Synaptosomal-associated protein 23                         |                                         |        |        |       |       |      |      |
|                                                            |                                         | SNP23  | 23505  | 2,09  | D2    | 2,09 | D2   |
| Syntaxins                                                  |                                         |        |        |       |       |      |      |
|                                                            | 2                                       | STX2   | 33452  | 3,24  | 4,83  | 1,66 | D2   |
|                                                            | 6                                       | STX6   | 29096  | D2    | D2    | D2   | D2   |
|                                                            | 7                                       | STX7   | 29946  | 4,63  | 6,91  | 2,35 | 4,74 |
|                                                            | 8                                       | STX8   | 27122  | 6,39  | 6,50  | 6,28 | D2   |
|                                                            | 13                                      | O70319 | 30563  | 4,32  | 4,80  | 3,84 | 3,65 |
|                                                            | 16                                      | B5DF99 | 25639  | D2    | D2    | D2   |      |
| Syntaxin-binding protein 1                                 |                                         |        |        |       |       |      |      |
|                                                            |                                         | STXB1  | 67925  | 2,41  | 3,66  | 1,17 |      |
| Syntaxin-binding protein 2                                 |                                         |        |        |       |       |      |      |
|                                                            |                                         | STXB2  | 67109  | 3,33  | 1,40  | 5,25 |      |
| Sorting nexin-3                                            |                                         |        |        |       |       |      |      |
|                                                            |                                         | SNX3   | 18808  | 5,00  | D2    | 5,00 | D2   |
| Snx5 protein                                               |                                         |        |        |       |       |      |      |
|                                                            |                                         | B1H267 | 47049  | 1,00  | 1,00  | 1,00 |      |
| Microtubule-associated proteins 1A/1B light chain 3B       |                                         |        |        |       |       |      |      |
|                                                            |                                         | MLP3B  | 16441  | D2    | D2    | D2   | D2   |
| Gamma-aminobutyric acid receptor-associated protein-like 2 |                                         |        |        |       |       |      |      |
|                                                            |                                         | GBRL2  | 13715  | 3,47  | D2    | 3,47 | D2   |
| Alpha-soluble NSF attachment protein                       |                                         |        |        |       |       |      |      |
|                                                            |                                         | SNAA   | 33627  | 2,56  | 2,52  | 2,60 | 2,92 |
| EH domain-containing protein 3                             |                                         |        |        |       |       |      |      |
|                                                            |                                         | EHD3   | 60810  | 0,80  | 0,48  | 1,12 |      |
| EH domain-containing protein 4                             |                                         |        |        |       |       |      |      |
|                                                            |                                         | Q8R3Z7 | 61656  | 0,44  | D7    | 0,88 |      |
| 28 kDa cis-Golgi SNARE p28                                 |                                         |        |        |       |       |      |      |
|                                                            |                                         | GOSR1  | 28630  | D2    | D2    | D2   | D2   |
| GTPase Ran                                                 |                                         |        |        |       |       |      |      |
|                                                            |                                         | RAN    | 24579  | 0,37  | 0,16  | 0,59 | D7   |
| RAN GTPase activating protein 1                            |                                         |        |        |       |       |      |      |
|                                                            |                                         | Q66H32 | 46947  | D7    | D7    | D7   |      |
| Importin subunit beta-1                                    |                                         |        |        |       |       |      |      |
|                                                            |                                         | IMB1   | 98373  | 0,20  | 0,11  | 0,28 | D7   |
| Putative uncharacterized protein Ipo4                      |                                         |        |        |       |       |      |      |
|                                                            |                                         | D4A2D7 | 119095 | D7    | D7    | D7   |      |
| Putative uncharacterized protein Ipo5                      |                                         |        |        |       |       |      |      |
|                                                            |                                         | D4A781 | 123706 | 0,12  | 0,11  | 0,12 |      |
| Importin 7 (Predicted), isoform CRA_c                      |                                         |        |        |       |       |      |      |
|                                                            |                                         | D4AE96 | 119488 | 0,11  | 0,02  | 0,19 |      |
| Putative uncharacterized protein Ipo9                      |                                         |        |        |       |       |      |      |
|                                                            |                                         | D4A857 | 116650 | D7    | D7    | D7   |      |
| Tnpo1 protein (Fragment)                                   |                                         |        |        |       |       |      |      |
|                                                            |                                         | Q5D008 | 89439  | D7    | D7    | D7   |      |
| Putative uncharacterized protein Tnpo2                     |                                         |        |        |       |       |      |      |
|                                                            |                                         | D3ZER6 | 105557 | D7    | D7    | D7   |      |
| Putative uncharacterized protein Tnpo3                     |                                         |        |        |       |       |      |      |
|                                                            |                                         | D4AAM0 | 104203 | D7    | D7    | D7   |      |
| Exportin-1                                                 |                                         |        |        |       |       |      |      |
|                                                            |                                         | XPO1   | 124099 | 0,20  | 0,09  | 0,30 |      |
| Exportin 7, isoform CRA_a                                  |                                         |        |        |       |       |      |      |
|                                                            |                                         | D3ZBB4 | 17569  | 0,77  | 0,71  | 0,84 |      |
| Xpo7 protein (Fragment)                                    |                                         |        |        |       |       |      |      |
|                                                            |                                         | Q5U3Y1 | 7833   | 0,20  | D7    | 0,39 | D7   |
| Vesicle-associated membrane protein 3                      |                                         |        |        |       |       |      |      |
|                                                            |                                         | VAMP3  | 11587  | 13,82 | 24,00 | 3,64 | 5,84 |

|                                                                                  |                                                      |        |        |       |       |      |
|----------------------------------------------------------------------------------|------------------------------------------------------|--------|--------|-------|-------|------|
| Vesicle-associated membrane protein 5                                            | VAMP5                                                | 11495  | D2     | D2    | D2    |      |
| Vesicle-associated membrane protein 7                                            | VAMP7                                                | 24776  | 7,29   | D2    | 7,29  |      |
| Vesicle-associated membrane protein 8                                            | VAMP8                                                | 11370  | 12,14  | 10,67 | 13,61 | D2   |
| Vesicle transport through interaction with t-SNAREs homolog 1A                   | QQJ151                                               | 26027  | 2,39   | D2    | 2,39  | D2   |
| Vesicle transport through interaction with t-SNAREs homolog 1B                   | VT11B                                                | 26687  | 12,52  | 20,50 | 4,54  | D2   |
| Vacuolar protein sorting-associated protein 29                                   | B2RZ78                                               | 20626  | 1,11   | D2    | 1,11  |      |
| Vacuolar protein sorting-associated protein 26A                                  | VP26A                                                | 38205  | D2     | D2    | D2    |      |
| Vacuolar protein sorting-associated protein 45                                   | VPS45                                                | 65251  | 18,05  | 17,00 | 19,10 | D2   |
| Vps35 protein (Fragment)                                                         | B5DFC1                                               | 72978  | 1,87   | 2,20  | 1,54  |      |
| Vesicle-fusing ATPase                                                            | NSF                                                  | 82652  | 0,09   | D7    | 0,17  |      |
| Vesicle-trafficking protein SEC22b                                               | SC22B                                                | 24895  | 1,69   | 1,75  | 1,64  |      |
| Secretory carrier-associated membrane protein 1                                  | SCAM1                                                | 38373  | D2     | D2    | D2    |      |
| Transmembrane emp24 domain-containing protein 10                                 | TMEDA                                                | 25013  | 2,25   | 4,00  | 0,50  | D2   |
| Dysf                                                                             | D4A6X1                                               | 233191 | 2,58   | 3,96  | 1,20  |      |
| General vesicular transport factor p115                                          | P41542                                               | 107162 | D7     | D7    | D7    |      |
| Ankyrin-1                                                                        | D3Z9M4                                               | 208680 | 0,12   | 0,08  | 0,16  |      |
| Autophagy-related protein 9A                                                     | ATG9A                                                | 95397  | 12,25  | 12,25 | D2    |      |
| General vesicular transport factor p115                                          | USO1                                                 | 108122 | D7     | D7    | D7    |      |
| COPI vesicle coat                                                                |                                                      |        |        |       |       |      |
|                                                                                  | Copa protein                                         | B5DFK1 | 139926 | 1,76  | D7    | 1,76 |
|                                                                                  | subunit beta                                         | COPB   | 108083 | 2,42  | D7    | 2,42 |
|                                                                                  | subunit beta'                                        | COPB2  | 103342 | 1,08  | D7    | 1,08 |
|                                                                                  | subunit delta                                        | COPD   | 57619  | 0,75  | D7    | 0,75 |
|                                                                                  | subunit gamma                                        | COPG   | 98806  | 0,92  | 0,67  | 1,16 |
|                                                                                  | Coatomer protein complex, subunit zeta 1 (Predicted) | D4A8T3 | 20242  | 0,80  | 1,00  | 0,60 |
|                                                                                  | Transmembrane emp24 domain-containing protein 2      | TMED2  | 22832  | 1,33  | 1,66  | 1,00 |
|                                                                                  |                                                      |        |        |       |       |      |
|                                                                                  |                                                      |        |        |       |       |      |
| <b>(11) Other cytoplasmic proteins</b>                                           |                                                      |        |        |       |       |      |
| Ac1873                                                                           | Q7TQ70                                               | 87344  | 24,77  | D2    | 24,77 | D2   |
| Ac2-269                                                                          | Q7TPI7                                               | 37728  | D7     | D7    | D7    |      |
| PKC-theta-interacting protein - Glutaredoxin-3                                   | GLRX3                                                | 38111  | 0,29   | 0,20  | 0,37  | D7   |
| Peptidyl-prolyl cis-trans isomerase A                                            | PPIA                                                 | 18091  | 1,34   | 1,54  | 1,14  | 1,33 |
| Dipeptidyl-peptidase 3                                                           | O55096                                               | 83386  | 0,22   | D7    | 0,44  |      |
| Protein disulfide-isomerase A3                                                   | PDIA3                                                | 57044  | 1,18   | 1,50  | 0,85  | 1,40 |
| Putative uncharacterized protein Wbp2                                            | D4A0J1                                               | 37484  | 2,51   | 2,90  | 2,12  | D2   |
| Protein MEMO1                                                                    | MEMO1                                                | 34057  | 0,60   | 0,38  | 0,81  | D7   |
| Phosphatidylinositol 4-kinase type 2-alpha                                       | P4K2A                                                | 54727  | D2     | D2    | D2    |      |
| Phosphatidylinositol 4-kinase type 2-beta                                        | P4K2B                                                | 55000  | D2     | D2    | D2    | D2   |
| Protein phosphatase 1 regulatory subunit 7                                       | PP1R7                                                | 41385  | D7     | D7    | D7    | D7   |
| Serine/threonine-protein phosphatase 2A catalytic subunit alpha isoform          | PP2AA                                                | 36156  | 0,34   | 0,12  | 0,57  | D7   |
| Serine/threonine-protein phosphatase 6 catalytic subunit                         | PPP6                                                 | 35821  | 0,79   | D7    | 0,79  |      |
| Serine/threonine Ste20-like kinase 3                                             | B0LT89                                               | 47990  | D7     | D7    | D7    |      |
| Protein phosphatase 1B                                                           | PPM1B                                                | 43488  | D7     | D7    | D7    |      |
| Xaa-Pro aminopeptidase 1                                                         | XPP1                                                 | 70354  | 0,15   | D7    | 0,30  |      |
| UDP-N-acetylglucosamine--peptide N-acetylglucosaminyltransferase 110 kDa subunit | P56558                                               | 115606 | 0,27   | 0,33  | 0,21  |      |
| Calcium-regulated heat stable protein 1                                          | Q9WU49                                               | 15906  | 0,40   | 0,40  | 0,39  |      |
| Putative uncharacterized protein Tll12                                           | D4A1Q9                                               | 74404  | 0,13   | 0,05  | 0,22  |      |
| Regucalcin                                                                       | Q03336                                               | 33390  | D7     | D7    | D7    |      |
| Huntingtin                                                                       | HD                                                   | 347478 | D7     | D7    | D7    |      |
| NHL repeat containing 2 (Predicted)                                              | D3ZLM5                                               | 79254  | D7     | D7    | D7    |      |
| Thioredoxin-like protein 1                                                       | Q920J4                                               | 32249  | 0,22   | D7    | 0,45  |      |
| Thioredoxin-like protein 2                                                       | Q9JLZ1                                               | 37849  | 0,29   | 0,20  | 0,37  |      |
| Tissue-type transglutaminase                                                     | Q9WVJ6                                               | 76935  | 0,07   | D7    | 0,15  |      |
| Placenta-specific 8 (Predicted)                                                  | B5DF36                                               | 13173  | 2,09   | D2    | 2,09  | D2   |
| Obg-like ATPase 1                                                                | OLA1                                                 | 44792  | 0,32   | 0,32  | 0,31  | D7   |
| Tyrosine-protein phosphatase non-receptor type 23 (Fragment)                     | PTN23                                                | 163978 | D7     | D7    | D7    |      |
| Casein kinase II subunit alpha                                                   | CSK21                                                | 45158  | 1,11   | 0,96  | 1,26  |      |
| Casein kinase II subunit beta                                                    | CSK2B                                                | 25268  | 0,94   | 1,00  | 0,89  |      |
| Calreticulin                                                                     | CALR                                                 | 48136  | 1,15   | 1,50  | 0,80  |      |
| Phospholipase A-2-activating protein                                             | PLAP                                                 | 88510  | D7     | D7    | D7    |      |
| cAMP-dependent protein kinase type II-alpha regulatory subunit                   | KAP2                                                 | 45797  | D7     | D7    | D7    |      |
| Map2k3 protein                                                                   | B1H230                                               | 39627  | D2     | D2    | D2    |      |
| Protein disulfide-isomerase                                                      | PDIA1                                                | 57315  | 4,38   | 1,75  | 7,00  |      |
| Translationally-controlled tumor protein                                         | TCTP                                                 | 19563  | 0,50   | 0,43  | 0,58  |      |
| Calcium-regulated heat stable protein 1                                          | CHSP1                                                | 16124  | 0,39   | 0,40  | 0,38  |      |
| Tyrosine-protein kinase Lyn                                                      | LYN                                                  | 59079  | D2     |       | D2    |      |
|                                                                                  |                                                      |        |        |       |       |      |
| <b>(12) Mitochondrial proteins</b>                                               |                                                      |        |        |       |       |      |
| ATP-binding cassette sub-family B member 6, mitochondrial                        | ABCB6                                                | 93305  | 11,79  | 18,29 | 5,29  | D2   |
| Dihydrolipoyl dehydrogenase, mitochondrial                                       | DLDH                                                 | 54574  | 1,00   | D2    | 1,00  | D2   |
| Prohibitin                                                                       | PHB                                                  | 29859  | 0,73   | 0,89  | 0,57  | 2,60 |
| Prohibitin-2                                                                     | PHB2                                                 | 33292  | 1,25   | 2,00  | 0,50  | 3,00 |

|                                                                              |        |        |       |       |       |       |
|------------------------------------------------------------------------------|--------|--------|-------|-------|-------|-------|
| Thioredoxin-dependent peroxide reductase, mitochondrial                      | PRDX3  | 28563  | 2,12  | 2,25  | 1,98  | D2    |
| Serine hydroxymethyltransferase                                              | Q5U3Z7 | 56243  | 0,37  | 0,18  | 0,55  |       |
| Cytochrome b-c1 complex subunit 1, mitochondrial                             | QCR1   | 53499  | 0,74  | 0,86  | 0,61  |       |
| Cytochrome c oxidase subunit 2                                               | COX2   | 26096  | 0,93  | 1,00  | 0,86  |       |
| Voltage-dependent anion-selective channel protein 2                          | P81155 | 31746  | 3,71  | 3,00  | 4,43  |       |
| Hydroxyacylglutathione hydrolase, mitochondrial                              | O35952 | 34109  | 0,17  | D7    | 0,35  |       |
| UMP-CMP kinase 2, mitochondrial                                              | D3ZC63 | 50113  | 0,18  | 0,04  | 0,33  |       |
| ATP synthase subunit alpha, mitochondrial                                    | ATPA   | 59830  | 0,78  | 0,81  | 0,75  | 2,00  |
| ATP synthase subunit beta, mitochondrial                                     | ATPB   | 56318  | 0,56  | 0,48  | 0,64  | 0,60  |
| ATP synthase subunit delta, mitochondrial                                    | ATPD   | 17584  | 0,50  | D7    | 1,00  |       |
| ATP synthase subunit gamma, mitochondrial                                    | ATPG   | 30228  | 0,15  | D7    | 0,31  |       |
| ATP synthase subunit O, mitochondrial                                        | ATPO   | 23439  | 0,58  | 0,67  | 0,50  |       |
| 60 kDa HSP mitochondrial                                                     | CH60   | 61088  | 1,02  | 1,51  | 0,53  | 2,08  |
| ATP-binding cassette, sub-family E (OABP), member 1                          | D3ZD23 | 68226  | 0,33  | 0,21  | 0,46  |       |
| ATP-binding cassette, sub-family B (MDR/TAP), member 10                      | Q5FVL8 | 77688  | 1,17  | D2    | 1,17  |       |
| Coproporphyrinogen-III oxidase, mitochondrial                                | HEM6   | 49817  | 1,14  | 1,00  | 1,27  | 0,95  |
| ADP/ATP translocase 2                                                        | ADT2   | 33108  | 1,13  | 1,30  | 0,95  |       |
| Putative uncharacterized protein Cmpk2                                       | D3ZC63 | 50880  | 0,16  | D7    | 0,31  |       |
| Citrate synthase, mitochondrial                                              | CISY   | 52175  | 0,87  | 0,63  | 1,10  |       |
| Malate dehydrogenase, mitochondrial                                          | MDHM   | 36116  | 0,73  | 0,85  | 0,62  |       |
| 2-oxoglutarate dehydrogenase, mitochondrial                                  | ODO1   | 117418 | 0,56  | 0,71  | 0,40  |       |
| Aconitate hydratase, mitochondrial                                           | ACON   | 86121  | 0,46  | D7    | 0,91  |       |
| Stress-70 protein, mitochondrial                                             | GRP75  | 74096  | 0,44  | D7    | 0,88  |       |
| Slc25a3 protein                                                              | Q6IRH6 | 40051  | 1,00  | 1,25  | 0,75  |       |
| Aldehyde dehydrogenase, mitochondrial                                        | ALDH2  | 56966  | 0,73  | 0,67  | 0,80  |       |
| Electron transfer flavoprotein subunit alpha, mitochondrial                  | ETFA   | 35272  | 0,88  | 1,00  | 0,75  |       |
| NADH dehydrogenase [ubiquinone] 1 alpha subcomplex subunit 10, mitochondrial | Q561S0 | NDUAA  | D7    | D7    | D7    |       |
| Pyruvate dehydrogenase E1 component subunit beta, mitochondrial              | ODPB   | 39299  | 0,50  | 0,67  | 0,33  |       |
| Isocitrate dehydrogenase [NAD] subunit alpha, mitochondrial                  | IDH3A  | 40044  | 0,62  | 0,57  | 0,67  |       |
|                                                                              |        |        |       |       |       |       |
| <b>(13) Lysosomal proteins</b>                                               |        |        |       |       |       |       |
| Lysosomal acid lipase/cholesterol ester hydrolase                            | LICH   | 45186  | D2    | D2    | D2    |       |
| Lysosome membrane protein 2                                                  | SCRB2  | 54513  | D2    | D2    | D2    | D2    |
| LAMP-2                                                                       | Q6P6W1 | 45571  | 2,36  | D2    | 2,36  | D2    |
| LAMP-1                                                                       | LAMP1  | 44397  | 9,93  | 16,50 | 3,35  | D2    |
| V-H+ATPase subunit a2 (ATPase, H+ transporting, lysosomal V0 subunit A2)     | Q2I6B1 | 99118  | D2    | D2    | D2    |       |
| ATPase, H transporting, lysosomal V1 subunit G1                              | B2GUV5 | 13816  | 5,23  | D2    | 5,23  | D2    |
| ATPase, H+ transporting, lysosomal 38kDa, V0 subunit d1                      | Q5M7T6 | 40301  | 7,85  | 7,41  | 8,28  |       |
| ATPase, H+ transporting, lysosomal accessory protein 1                       | Q6IRF8 | 51185  | D2    | D2    | D2    | D2    |
| Cytochrome b ascorbate-dependent protein 3                                   | Q5U2W7 | 28650  | D2    | D2    | D2    |       |
| Lysosomal acid phosphatase                                                   | PPAL   | 48320  | 9,19  | 9,00  | 9,38  |       |
| Cathepsin B                                                                  | P00787 | 37470  | D2    | D2    | D2    |       |
| Cathepsin D                                                                  | P24268 | 44681  | D2    | D2    | D2    |       |
| H(+)/Cl(-) exchange transporter 7                                            | CLCN7  | 89187  | D2    | D2    | D2    |       |
| Tripeptidyl-peptidase 1                                                      | TPP1   | 61332  | D2    | D2    | D2    |       |
| V-type proton ATPase 16 kDa proteolipid subunit                              | VATL   | 15798  | 9,00  | 9,00  | D2    |       |
| ATP-binding cassette sub-family B member 9                                   | ABC9   | 84379  | D2    | D2    | D2    | D2    |
|                                                                              |        |        |       |       |       |       |
| <b>(14) Extracellular proteins</b>                                           |        |        |       |       |       |       |
| Fibrinogen beta chain                                                        | FIBB   | 54828  | D2    | D2    | D2    | D2    |
| Fibrinogen gamma chain                                                       | FIBG   | 51228  | D2    | D2    | D2    | D2    |
| Fibronectin                                                                  | FINC   | 275990 | 3,00  | 3,62  | 2,39  | D2    |
| Fga protein                                                                  | A1L114 | 60505  | 24,65 | D2    | 24,65 |       |
| von Willebrand factor (Fragment)                                             | VWF    | 48394  | 4,36  | 6,00  | 2,72  | D2    |
| Serotransferrin                                                              | TRFE   | 78512  | 11,14 | 15,76 | 6,52  | 19,70 |
| Complement C3                                                                | CO3    | 187825 | 0,32  | D7    | 0,64  | D7    |
| CRAMP (Fragment)                                                             | Q71KM5 | 19536  | D2    | D2    | D2    | D2    |
| Cathepsin Z                                                                  | Q9R1T3 | 34194  | D2    | D2    | D2    |       |
| Neutrophilic granule protein (Predicted)                                     | D3ZY96 | 19381  | 2,24  | D2    | 2,24  |       |
| Galectin-3-binding protein                                                   | O70513 | 63742  | D2    | D2    | D2    |       |
| Lectin, galactoside-binding, soluble, 9                                      | Q6P7Q6 | 36341  | 3,56  | 4,00  | 3,13  |       |
| Alpha-1-macroglobulin                                                        | Q63041 | 167125 | D7    | D7    | D7    |       |
|                                                                              |        |        |       |       |       |       |
| <b>(15) Unknow functions</b>                                                 |        |        |       |       |       |       |
| LOC683667 protein                                                            | B0BNJ1 | 21952  | 7,99  | D2    | 7,99  | D2    |
| p55 protein                                                                  | Q5BK33 | 51343  | 0,63  | 0,54  | 0,73  | 0,33  |
| Solute carrier family 43, member 1 (Predicted)                               | B1WBX5 | 67972  | 1,82  | 2,39  | 1,25  | 1,63  |
| Small inducible cytokine subfamily E, member 1                               | Q4G079 | 34951  | 0,10  | D7    | 0,21  | D7    |
| Glucocorticoid-attenuated response gene 16 product                           | Q9JTT1 | 54006  | 0,27  | 0,25  | 0,30  | D7    |
| Alpha-2 antiplasmin                                                          | Q80ZA3 | 46493  | 0,21  | D7    | 0,42  | 0,21  |
| Putative uncharacterized protein ENSRNOP0000036443                           | D3ZFH5 | 106826 | 0,20  | D7    | 0,41  | D7    |
| Serine peptidase inhibitor, Kunitz type 1                                    | Q4V8Q2 | 58285  | D2    | D2    | D2    | D2    |

**Table S2**

Summary of the proteins identified by MS/MS spectrometry with an increased abundance at D4

| Identified protein                                                | Gene   | MW    | mean ratio |       |       |       |       |       |
|-------------------------------------------------------------------|--------|-------|------------|-------|-------|-------|-------|-------|
|                                                                   |        |       | Run 1      |       | Run 2 |       | Qstar |       |
|                                                                   |        |       | D2/D4      | D4/D7 | D2/D4 | D4/D7 | D2/D4 | D4/D7 |
| Solute carrier family 2, facilitated glucose transporter member 3 | GTR3   | 54002 | D4         | D4    | D4    | 9.50  | 0.15  | D4    |
| Integrin beta                                                     | B2RYB8 | 87955 | D4         | D4    | 0.68  | 1.81  | 0.22  | D4    |
| CD151 antigen                                                     | CD151  | 29192 | D4         | D4    | 0.43  | D4    | D4    | D4    |
| Histone H2A type 1                                                | P02262 |       | 1,35       | 4,53  | 0,31  | 2,61  |       |       |
| Endoplasmin                                                       | Q66HD0 | 92998 | 0.26       | 3.80  | 0.36  | 1.86  |       |       |
| Filamin alpha                                                     | C0JPT7 |       | 0.43       | 0.94  | 0.37  | 2.96  |       |       |
| Protein disulfide-isomerase A3                                    | PDIA3  | 57043 | 0.83       | 2.00  | 0.38  | 2.25  | 1.40  | D4    |
| DnaJ homolog subfamily B member 6                                 | Q6AYU3 |       | 0.50       | D4    | 0.40  | 5.00  |       |       |
| Putative uncharacterized protein Itga2b                           | D3ZAC0 |       | 0.41       | 6.50  | 0.45  | 2.40  |       |       |
| Calnexin                                                          | P35565 |       | 0.37       | D4    | 0.29  | 2.33  |       |       |
