# Supplementary material
Source: PubMed Central journal article supplement (PMC3190795)
Supplement: supp_M111.257444_jbc.M111.257444-3.pdf [file supp_M111.257444_jbc.M111.257444-3.pdf]

|     |           |            |           |       |                                                                             |                  |        |   |   |      |            |       |   |   |      |  |  |                   |        |   |   |      |   |
|-----|-----------|------------|-----------|-------|-----------------------------------------------------------------------------|------------------|--------|---|---|------|------------|-------|---|---|------|--|--|-------------------|--------|---|---|------|---|
| 346 | Q5HZV9    | PP1R7_RAT  | 41385.49  | 4.84  | Protein phosphatase 1 regulatory subunit 7                                  |                  |        |   |   |      |            |       |   |   |      |  |  | e7                | 78.93  | 2 | 2 | 8.3  | 2 |
| 347 | Q5XIR9    | UBAC1_RAT  | 45746.16  | 4.85  | Ubiquitin-associated domain-containing protein 1                            |                  |        |   |   |      |            |       |   |   |      |  |  | e7                | 64.88  | 2 | 2 | 5.4  | 2 |
| 348 | P50399    | GDIB_RAT   | 51017.88  | 5.93  | Rab GDP dissociation inhibitor beta                                         |                  |        |   |   |      |            |       |   |   |      |  |  | e7                | 57.72  | 2 | 2 | 6.7  | 2 |
| 349 | P54311    | GBB1_RAT   | 38151.31  | 5.6   | Guanine nucleotide-binding protein G(I)/G(S)/G                              | e8               |        | 2 | 2 | 5.9  | 2          |       |   |   |      |  |  | e8                | 70.14  | 2 | 2 | 5.9  | 2 |
| 350 | B5DEN5    | B5DEN5_RAT | 24831.35  | 4.55  | Eukaryotic translation elongation factor 1 beta 2 (RCG22471, isoform CRA_b) |                  |        |   |   |      |            |       |   |   |      |  |  | e8                | 62.01  | 2 | 2 | 9.8  | 2 |
| 351 | O88298    | O88298_RAT | 46951.5   | 9.19  | Rh blood group protein                                                      |                  |        |   |   |      | e8         | 52.05 | 1 | 1 | 2.6  |  |  | 1 e8              | 57.63  | 2 | 2 | 6.9  | 2 |
| 352 | O35796    | C1QBP_RAT  | 31319.65  | 4.77  | Complement component 1 Q subcomponent-binding protein, mitochondrial        |                  |        |   |   |      | e8         | 73.91 | 2 | 2 | 12.2 |  |  | 2 e8              | 53.07  | 2 | 2 | 12.2 | 2 |
| 353 | Q7TPK2    | Q7TPK2_RAT | 238307.95 | 5.41  | Ac2-120                                                                     |                  |        |   |   |      |            |       |   |   |      |  |  | e8                | 49.74  | 2 | 2 | 1    | 2 |
| 354 | P27605    | HPRT_RAT   | 24689.62  | 6.07  | Hypoxanthine-guanine phosphoribosyltransferase                              |                  |        |   |   |      |            |       |   |   |      |  |  | e9                | 101.07 | 2 | 2 | 10.6 | 2 |
| 355 | Q3T1J1    | IF5A1_RAT  | 17049.49  | 5.08  | Eukaryotic translation initiation factor 5A-1                               |                  |        |   |   |      |            |       |   |   |      |  |  | e10               | 52.99  | 2 | 2 | 10.4 | 2 |
| 356 | B2GV73    | B2GV73_RAT | 20750.42  | 8.78  | Actin related protein 2/3 complex, subunit 3                                |                  |        |   |   |      |            |       |   |   |      |  |  | e10               | 50.3   | 2 | 2 | 13.5 | 2 |
| 357 | P17078    | RL35_RAT   | 14543.62  | 11.05 | 60S ribosomal protein L35                                                   |                  |        |   |   |      | e10        | 57.42 | 1 | 1 | 10.6 |  |  | 1 e10             | 48.62  | 2 | 2 | 12.2 | 2 |
| 358 | RAB13_RAT | RAB13_RAT  | 0         | 9.47  |                                                                             |                  |        |   |   |      | e1         | 55.49 | 2 | 2 | 10.3 |  |  | 2                 |        |   |   |      |   |
| 359 | Q924W3    | Q924W3_RAT | 10928.69  | 9.02  | Integrin alpha 6 subchain (Fragment)                                        |                  |        |   |   |      | e3         | 45.53 | 2 | 2 | 16.2 |  |  | 2                 |        |   |   |      |   |
| 360 | Q9ET61    | C1QR1_RAT  | 71188.9   | 4.87  | Complement component C1q receptor                                           | e4               | 69.67  | 2 | 2 | 2.8  | 2 e4       | 55.13 | 2 | 2 | 2.5  |  |  | 2                 |        |   |   |      |   |
| 361 | HS90B_RAT | HS90B_RAT  | 0         | 4.97  |                                                                             |                  |        |   |   |      | e5         | 60.34 | 2 | 2 | 3.2  |  |  | 2                 |        |   |   |      |   |
| 362 | P21531    | RL3_RAT    | 46391.91  | 10.22 | 60S ribosomal protein L3                                                    |                  |        |   |   |      | e7         | 65.49 | 2 | 2 | 4    |  |  | 2                 |        |   |   |      |   |
| 363 | Q4FZT0    | STML2_RAT  | 38504.28  | 8.74  | Stomatin-like protein 2                                                     |                  |        |   |   |      | e7         | 48.56 | 2 | 2 | 7.1  |  |  | 2                 |        |   |   |      |   |
| 364 | P70633    | P70633_RAT | 46323.48  | 7.77  | Urea transporter                                                            |                  |        |   |   |      | e8         | 47.29 | 2 | 2 | 5.1  |  |  | 2                 |        |   |   |      |   |
| 365 | Q6TUH8    | Q6TUH8_RAT | 38569.51  | 10.16 | LRRGT00066                                                                  |                  |        |   |   |      | e9         | 57.6  | 2 | 2 | 7.6  |  |  | 2                 |        |   |   |      |   |
| 366 | P24049    | RL17_RAT   | 21611.45  | 10.2  | 60S ribosomal protein L17                                                   | e9               | 72.91  | 2 | 2 | 10.3 | 2 e10      | 61.71 | 1 | 1 | 8.7  |  |  | 1                 |        |   |   |      |   |
| 367 | RAB8B_RAT | RAB8B_RAT  | 0         | 9.15  |                                                                             | e1               | 88.58  | 2 | 2 | 14   | 2          |       |   |   |      |  |  |                   |        |   |   |      |   |
| 368 | P30823    | CTR1_RAT   | 68135.21  | 5.73  | High affinity cationic amino acid transporter 1                             | e5 (e1)          | 102.65 | 2 | 2 | 5.1  | 4          |       |   |   |      |  |  |                   |        |   |   |      |   |
| 369 | Q7JJ65    | Q7JJ65_RAT | 40199     | 5.68  | MHC class Ib RT1.S3 (Fragment)                                              | e1               | 63.37  | 2 | 2 | 7.4  | 2          |       |   |   |      |  |  |                   |        |   |   |      |   |
| 370 | P58366    | ANKH_RAT   | 54742.6   | 8     | Progressive ankylosis protein homolog                                       | e2               | 67.97  | 2 | 2 | 4.7  | 2          |       |   |   |      |  |  |                   |        |   |   |      |   |
| 371 | P11598    | PDIA3_RAT  | 57043.87  | 5.88  | Protein disulfide-isomerase A3                                              | e6               | 67.81  | 2 | 2 | 3.6  | 2          |       |   |   |      |  |  |                   |        |   |   |      |   |
| 372 | Q6P7S0    | Q6P7S0_RAT | 53472.59  | 7.96  | Pyruvate kinase                                                             | e6               | 62.65  | 2 | 2 | 5.7  | 2          |       |   |   |      |  |  |                   |        |   |   |      |   |
| 373 | Q08163    | CAP1_RAT   | 51898.61  | 7.16  | Adenylyl cyclase-associated protein 1                                       | e6               | 50.5   | 2 | 2 | 8.4  | 2          |       |   |   |      |  |  |                   |        |   |   |      |   |
| 374 | B2GVB9    | B2GVB9_RAT | 76145.16  | 6.63  | Fermt3 protein                                                              | e8               | 75.49  | 2 | 2 | 3.5  | 2          |       |   |   |      |  |  |                   |        |   |   |      |   |
| 375 | Q9ERM8    | Q9ERM8_RAT | 25218.67  | 8.76  | Secretory carrier membrane protein 3 (Fragment)                             | e8               | 63.56  | 2 | 2 | 14.2 | 2          |       |   |   |      |  |  |                   |        |   |   |      |   |
| 376 | Q5M860    | Q5M860_RAT | 22926.56  | 4.99  | Rho, GDP dissociation inhibitor (GDI) beta                                  | e9               | 68.44  | 2 | 2 | 17.5 | 2          |       |   |   |      |  |  |                   |        |   |   |      |   |
| 377 | Q62931    | GOSR1_RAT  | 28629.57  | 9.34  | Golgi SNAP receptor complex member 1                                        | e9               | 68.23  | 1 | 1 | 6    | 2          |       |   |   |      |  |  |                   |        |   |   |      |   |
| 378 | Q9JI51    | VTI1A_RAT  | 26026.61  | 6.07  | Vesicle transport through interaction with t-SNA                            | e9               | 58.52  | 2 | 2 | 7.1  | 2          |       |   |   |      |  |  |                   |        |   |   |      |   |
| 379 | B5DFJ7    | B5DFJ7_RAT | 21145.61  | 6.51  | Tmem9 protein (Transmembrane protein 9 (Pre                                 | e9               | 43.94  | 2 | 2 | 7.7  | 2          |       |   |   |      |  |  |                   |        |   |   |      |   |
| 380 | P62268    | RS23_RAT   | 15968.78  | 10.5  | 40S ribosomal protein S23                                                   | e10              | 80.07  | 2 | 2 | 13.3 | 2          |       |   |   |      |  |  |                   |        |   |   |      |   |
| 381 | P62890    | RL30_RAT   | 12946.81  | 9.65  | 60S ribosomal protein L30                                                   | e10              | 70.44  | 2 | 2 | 17.4 | 2          |       |   |   |      |  |  |                   |        |   |   |      |   |
| 382 | P45592    | COF1_RAT   | 18748.75  | 8.22  | Cofilin-1                                                                   | e10              | 62.2   | 2 | 2 | 11.4 | 2          |       |   |   |      |  |  |                   |        |   |   |      |   |
| 383 | P62832    | RL23_RAT   | 14970.1   | 10.51 | 60S ribosomal protein L23                                                   | e10              | 47.09  | 2 | 2 | 20.7 | 2          |       |   |   |      |  |  |                   |        |   |   |      |   |
| 384 | O35511    | O35511_RAT | 17553.29  | 8.8   | A regulatory subunit of protein phosphatase 2A (Fragment)                   |                  |        |   |   |      |            |       |   |   |      |  |  | e5 (e2, e1, e6, e | 89.83  | 1 | 1 | 12.9 | 6 |
| 385 | Q5U3Y1    | Q5U3Y1_RAT | 7833.7    | 6.78  | Xpo7 protein (Fragment)                                                     |                  |        |   |   |      |            |       |   |   |      |  |  | e1                | 56     | 1 | 1 | 16.4 | 1 |
| 386 | P50398    | GDIA_RAT   | 51074.37  | 5     | Rab GDP dissociation inhibitor alpha                                        |                  |        |   |   |      |            |       |   |   |      |  |  | e6                | 54.07  | 1 | 1 | 4.3  | 1 |
| 387 | Q9JLZ1    | GLRX3_RAT  | 38110.53  | 5.51  | Glutaredoxin-3                                                              |                  |        |   |   |      |            |       |   |   |      |  |  | e7                | 105.69 | 1 | 1 | 6.2  | 1 |
| 388 | Q68FW9    | CSN3_RAT   | 48398.21  | 6.19  | COP9 signalosome complex subunit 3                                          |                  |        |   |   |      |            |       |   |   |      |  |  | e7                | 70.65  | 1 | 1 | 2.8  | 1 |
| 389 | Q32Q05    | OTU1_RAT   | 37949     | 5.61  | Ubiquitin thioesterase OTU1                                                 |                  |        |   |   |      |            |       |   |   |      |  |  | e8                | 47.45  | 1 | 1 | 2.6  | 1 |
| 390 | P62083    | RS7_RAT    | 22113.26  | 10.09 | 40S ribosomal protein S7                                                    |                  |        |   |   |      |            |       |   |   |      |  |  | e9                | 55.83  | 1 | 1 | 11.3 | 1 |
| 391 | B5DF36    | B5DF36_RAT | 13173.9   | 7.89  | Placenta-specific 8 (Predicted)                                             | e8 (e6, e7, e10, | 97.09  | 1 | 1 | 13.4 | 5 e10 (e7) | 87.96 | 1 | 1 | 13.4 |  |  | 2                 |        |   |   |      |   |
| 392 | Q9QYJ4    | ABC99_RAT  | 84378.99  | 7.02  | ATP-binding cassette sub-family B member 9                                  | e1               | 62.18  | 1 | 1 | 1.8  | 1          |       |   |   |      |  |  |                   |        |   |   |      |   |
| 393 | P28572    | SC6A9_RAT  | 71493.27  | 8.2   | Sodium- and chloride-dependent glycine transp                               | e1               | 50.64  | 1 | 1 | 3.5  | 1          |       |   |   |      |  |  |                   |        |   |   |      |   |
| 394 | Q6AZ61    | LMBD1_RAT  | 61663.1   | 7.87  | Probable lysosomal cobalamin transporter                                    | e4               | 71.06  | 1 | 1 | 3.4  | 1          |       |   |   |      |  |  |                   |        |   |   |      |   |
| 395 | Q4V8Q2    | Q4V8Q2_RAT | 58285.71  | 5.29  | Serine peptidase inhibitor, Kunitz type 1                                   | e6               | 60.94  | 1 | 1 | 3.7  | 1          |       |   |   |      |  |  |                   |        |   |   |      |   |
| 396 | Q66HG5    | TM9S2_RAT  | 76619.75  | 7.23  | Transmembrane 9 superfamily member 2                                        | e6               | 55.99  | 1 | 1 | 2.1  | 1          |       |   |   |      |  |  |                   |        |   |   |      |   |
| 397 | B2RYA8    | B2RYA8_RAT | 30675.84  | 4.79  | LOC689593 protein                                                           | e7               | 58.48  | 1 | 1 | 4    | 1          |       |   |   |      |  |  |                   |        |   |   |      |   |
| 399 | Q5RKH7    | CB018_RAT  | 41407.69  | 6.75  | Transmembrane protein C2orf18 homolog                                       | e8               | 58.35  | 1 | 1 | 2.4  | 1          |       |   |   |      |  |  |                   |        |   |   |      |   |
| 400 | P04906    | GSTP1_RAT  | 23652.15  | 6.89  | Glutathione S-transferase P                                                 | e9               | 64.5   | 1 | 1 | 7.6  | 1          |       |   |   |      |  |  |                   |        |   |   |      |   |
| 401 | P62853    | RS25_RAT   | 13790.72  | 10.12 | 40S ribosomal protein S25                                                   | e10              | 52.82  | 1 | 1 | 7.2  | 1          |       |   |   |      |  |  |                   |        |   |   |      |   |
| 402 | Q6P742    | PLP2_RAT   | 16830.77  | 6.7   | Proteolipid protein 2                                                       | e10              | 47.99  | 1 | 1 | 7.9  | 1          |       |   |   |      |  |  |                   |        |   |   |      |   |
| 403 | Q71KM5    | Q71KM5_RAT | 19536.25  | 8.67  | CRAMP (Fragment)                                                            | e10              | 47.27  | 1 | 1 | 9.4  | 1          |       |   |   |      |  |  |                   |        |   |   |      |   |

















[illegible]







|     |        |            |          |      |                                 |     |       |   |   |     |   |  |  |  |  |  |  |  |  |  |  |  |
|-----|--------|------------|----------|------|---------------------------------|-----|-------|---|---|-----|---|--|--|--|--|--|--|--|--|--|--|--|
| 972 | Q5U3Y5 | SFT2A_RAT  | 18273.65 | 9.19 | Vesicle transport protein SFT2A | e10 | 38.6  | 1 | 1 | 17  | 1 |  |  |  |  |  |  |  |  |  |  |  |
| 973 | Q71KM5 | Q71KM5_RAT | 19536.25 | 8.67 | CRAMP (Fragment)                | e10 | 37.34 | 1 | 1 | 9.4 | 1 |  |  |  |  |  |  |  |  |  |  |  |

























31





[illegible]

|      |        |            |           |       |                                                           |     |       |   |   |      |   |         |       |   |   |      |   |  |  |  |  |  |  |
|------|--------|------------|-----------|-------|-----------------------------------------------------------|-----|-------|---|---|------|---|---------|-------|---|---|------|---|--|--|--|--|--|--|
| 1301 | O08565 | CXCR4_RAT  | 39821.64  | 8.27  | C-X-C chemokine receptor type 4                           |     |       |   |   |      |   | B6 (B8) | 37.43 | 1 | 1 | 3.4  | 2 |  |  |  |  |  |  |
| 1302 | Q4KLN2 | Q4KLN2_RAT | 50509.74  | 9.2   | Mtx1 protein (Fragment)                                   |     |       |   |   |      |   | B7      | 57.35 | 1 | 1 | 3.4  | 1 |  |  |  |  |  |  |
| 1303 | B2GUZ9 | B2GUZ9_RAT | 37037.76  | 5.76  | Fam49b protein                                            |     |       |   |   |      |   | B7      | 41.53 | 1 | 1 | 3.1  | 1 |  |  |  |  |  |  |
| 1304 | Q5PPM8 | TM55B_RAT  | 31056.44  | 9.17  | Transmembrane protein 55B                                 |     |       |   |   |      |   | B7      | 40.28 | 1 | 1 | 3.9  | 1 |  |  |  |  |  |  |
| 1305 | Q4KLK0 | Q4KLK0_RAT | 16933.52  | 7.55  | Syntaxin 11                                               |     |       |   |   |      |   | B7      | 37.67 | 1 | 1 | 6.3  | 1 |  |  |  |  |  |  |
| 1306 | Q5RJY4 | DRS7B_RAT  | 35661.74  | 9.61  | Dehydrogenase/reductase SDR family member 7B              |     |       |   |   |      |   | B8      | 58.09 | 1 | 1 | 4.6  | 1 |  |  |  |  |  |  |
| 1307 | B5DEF5 | B5DEF5_RAT | 34714.62  | 5.44  | Slc39a1 protein                                           |     |       |   |   |      |   | B8      | 45.95 | 1 | 1 | 3.7  | 1 |  |  |  |  |  |  |
| 1308 | D3ZC50 | D3ZC50_RAT | 20451.19  | 8.16  | Putative uncharacterized protein ENSRNOP00000050817       |     |       |   |   |      |   | B8      | 41.96 | 1 | 1 | 7    | 1 |  |  |  |  |  |  |
| 1309 | P21670 | PSA4_RAT   | 29764.28  | 7.59  | Proteasome subunit alpha type-4                           |     |       |   |   |      |   | B8      | 40.8  | 1 | 1 | 3.8  | 1 |  |  |  |  |  |  |
| 1310 | Q6AYQ8 | FAHD1_RAT  | 24749.69  | 7.62  | Fumarylacetoacetate hydrolase domain-containing protein 1 |     |       |   |   |      |   | B8      | 40.26 | 1 | 1 | 7.2  | 1 |  |  |  |  |  |  |
| 1311 | Q5XIF7 | Q5XIF7_RAT | 13780.96  | 8.74  | Nicotinamide nucleotide adenylyltransferase 3             |     |       |   |   |      |   | B8      | 38.41 | 1 | 1 | 8.2  | 1 |  |  |  |  |  |  |
| 1312 | Q9Z142 | TMM33_RAT  | 28306.92  | 9.72  | Transmembrane protein 33                                  |     |       |   |   |      |   | B9      | 75.08 | 1 | 1 | 4.9  | 1 |  |  |  |  |  |  |
| 1313 | Q75Q40 | TOM40_RAT  | 38294.31  | 8.62  | Mitochondrial import receptor subunit TOM40               | B9  | 64.39 | 1 | 1 | 4.2  | 1 | B9      | 73.98 | 1 | 1 | 4.2  | 1 |  |  |  |  |  |  |
| 1314 | D3ZR95 | D3ZR95_RAT | 11451.12  | 4.14  | Putative uncharacterized protein ENSRNOP                  | B9  | 55.09 | 1 | 1 | 9.9  | 1 | B9      | 58.8  | 1 | 1 | 9.9  | 1 |  |  |  |  |  |  |
| 1315 | Q62876 | SNG1_RAT   | 25880.41  | 4.49  | Synaptogyrin-1                                            |     |       |   |   |      |   | B9      | 38.62 | 1 | 1 | 5.1  | 1 |  |  |  |  |  |  |
| 1316 | D3ZF12 | D3ZF12_RAT | 20371.58  | 8.67  | Putative uncharacterized protein ENSRNOP00000062708       |     |       |   |   |      |   | B9      | 38.55 | 1 | 1 | 6.7  | 1 |  |  |  |  |  |  |
| 1317 | Q35820 | RCL_RAT    | 17940.88  | 4.95  | Deoxyribonucleoside 5'-monophosphate N-glycosidase        |     |       |   |   |      |   | B9      | 37.6  | 1 | 1 | 5.5  | 1 |  |  |  |  |  |  |
| 1318 | D3ZR91 | D3ZR91_RAT | 11587.95  | 7.66  | Putative uncharacterized protein Ifitm6                   | B10 | 39.09 | 1 | 1 | 15.4 | 1 | B10     | 75.91 | 1 | 1 | 15.4 | 1 |  |  |  |  |  |  |
| 1319 | D4A786 | D4A786_RAT | 6434.38   | 9.84  | Putative uncharacterized protein ENSRNOP00000061817       |     |       |   |   |      |   | B10     | 66.04 | 1 | 1 | 25.9 | 1 |  |  |  |  |  |  |
| 1320 | B2RZD1 | B2RZD1_RAT | 10039.13  | 11.57 | Sec61 beta subunit                                        |     |       |   |   |      |   | B10     | 55.04 | 1 | 1 | 15.6 | 1 |  |  |  |  |  |  |
| 1321 | Q6AXS4 | RENr_RAT   | 39057.28  | 5.36  | Renin receptor                                            | B10 | 53.38 | 1 | 1 | 3.7  | 1 | B10     | 45.85 | 1 | 1 | 3.7  | 1 |  |  |  |  |  |  |
| 1322 | D3ZSP1 | D3ZSP1_RAT | 10810.64  | 9.2   | Putative uncharacterized protein Snrpe                    |     |       |   |   |      |   | B10     | 42.92 | 1 | 1 | 12   | 1 |  |  |  |  |  |  |
| 1323 | Q7TQ16 | QCR8_RAT   | 9843.21   | 10.52 | Cytochrome b-c1 complex subunit 8                         |     |       |   |   |      |   | B10     | 39.14 | 1 | 1 | 15.9 | 1 |  |  |  |  |  |  |
| 1324 | D3ZCZ9 | D3ZCZ9_RAT | 13202.78  | 9.33  | Putative uncharacterized protein LOC692052                |     |       |   |   |      |   | B10     | 37.74 | 1 | 1 | 12.9 | 1 |  |  |  |  |  |  |
| 1325 | B4F783 | B4F783_RAT | 102243.16 | 6.5   | RGD1308009 protein (Fragment)                             | B1  | 48.42 | 1 | 1 | 1.1  | 1 |         |       |   |   |      |   |  |  |  |  |  |  |
| 1326 | Q4KLH1 | Q4KLH1_RAT | 17175.47  | 4.5   | Ascc3l1 protein                                           | B2  | 53.56 | 1 | 1 | 10.6 | 1 |         |       |   |   |      |   |  |  |  |  |  |  |
| 1327 | Q3YAF8 | Q3YAF8_RAT | 42863.68  | 6.5   | Adiponectin receptor 1                                    | B2  | 46.58 | 1 | 1 | 3.2  | 1 |         |       |   |   |      |   |  |  |  |  |  |  |
| 1328 | Q4FZU6 | ANXA8_RAT  | 36910.69  | 5.55  | Annexin A8                                                | B2  | 45.7  | 1 | 1 | 4.6  | 1 |         |       |   |   |      |   |  |  |  |  |  |  |
| 1329 | Q5U2W8 | Q5U2W8_RAT | 64761.4   | 8.58  | Similar to POT1-like telomere end-binding p               | B3  | 43.75 | 1 | 1 | 1    | 1 |         |       |   |   |      |   |  |  |  |  |  |  |
| 1330 | B0BNE1 | B0BNE1_RAT | 28416.7   | 8.71  | Mediator complex subunit 6                                | B3  | 37.86 | 1 | 1 | 2.8  | 1 |         |       |   |   |      |   |  |  |  |  |  |  |
| 1331 | D3ZYP5 | D3ZYP5_RAT | 56187.8   | 5.59  | Putative uncharacterized protein Trim58                   | B5  | 62.43 | 1 | 1 | 2.1  | 1 |         |       |   |   |      |   |  |  |  |  |  |  |
| 1332 | D3ZU40 | D3ZU40_RAT | 56218.75  | 6.45  | Putative uncharacterized protein Tmem104                  | B5  | 39.8  | 1 | 1 | 2.2  | 1 |         |       |   |   |      |   |  |  |  |  |  |  |
| 1333 | Q64194 | LICH_RAT   | 45498.7   | 6.56  | Lysosomal acid lipase/cholesteryl ester hydr              | B6  | 65.38 | 1 | 1 | 3.3  | 1 |         |       |   |   |      |   |  |  |  |  |  |  |
| 1334 | Q5XIP6 | Q5XIP6_RAT | 42924.2   | 8.68  | Fen1 protein                                              | B6  | 51.75 | 1 | 1 | 4.5  | 1 |         |       |   |   |      |   |  |  |  |  |  |  |
| 1335 | Q5RJK6 | Q5RJK6_RAT | 43731.21  | 4.95  | Inositol polyphosphate-1-phosphatase                      | B6  | 41.62 | 1 | 1 | 2.3  | 1 |         |       |   |   |      |   |  |  |  |  |  |  |
| 1336 | Q63745 | Q63745_RAT | 44923.48  | 6.61  | Protein tyrosine phosphatase                              | B6  | 40.58 | 1 | 1 | 4.2  | 1 |         |       |   |   |      |   |  |  |  |  |  |  |
| 1337 | P81799 | NAGK_RAT   | 37457.81  | 5.55  | N-acetyl-D-glucosamine kinase                             | B7  | 64.26 | 1 | 1 | 3.8  | 1 |         |       |   |   |      |   |  |  |  |  |  |  |
| 1338 | P43138 | APEX1_RAT  | 35915.24  | 8.04  | DNA-(apurinic or apyrimidinic site) lyase                 | B7  | 56.05 | 1 | 1 | 5.4  | 1 |         |       |   |   |      |   |  |  |  |  |  |  |
| 1339 | D4A415 | D4A415_RAT | 47145.12  | 5.89  | Putative uncharacterized protein Fam175b                  | B7  | 40.06 | 1 | 1 | 4.1  | 1 |         |       |   |   |      |   |  |  |  |  |  |  |
| 1340 | D3ZZR5 | D3ZZR5_RAT | 28414.14  | 8.92  | Putative uncharacterized protein ENSRNOP                  | B8  | 49.4  | 1 | 1 | 5.5  | 1 |         |       |   |   |      |   |  |  |  |  |  |  |
| 1341 | D3ZE08 | D3ZE08_RAT | 13478.94  | 9.39  | Putative uncharacterized protein ENSRNOP                  | B8  | 40.4  | 1 | 1 | 10.9 | 1 |         |       |   |   |      |   |  |  |  |  |  |  |
| 1342 | Q920P0 | DCXR_RAT   | 25931.48  | 6.82  | L-xylulose reductase                                      | B8  | 38.96 | 1 | 1 | 4.9  | 1 |         |       |   |   |      |   |  |  |  |  |  |  |
| 1343 | B0BNM1 | B0BNM1_RAT | 31212.87  | 6.43  | Apoa1bp protein                                           | B8  | 38.54 | 1 | 1 | 4.3  | 1 |         |       |   |   |      |   |  |  |  |  |  |  |
| 1344 | Q5BJU0 | Q5BJU0_RAT | 23612.81  | 5.74  | RCG40097                                                  | B8  | 38.24 | 1 | 1 | 5.9  | 1 |         |       |   |   |      |   |  |  |  |  |  |  |
| 1345 | Q69BT7 | TPPC4_RAT  | 24457.5   | 5.83  | Trafficking protein particle complex subunit 4            | B9  | 69.46 | 1 | 1 | 6.4  | 1 |         |       |   |   |      |   |  |  |  |  |  |  |
| 1346 | D3ZE46 | D3ZE46_RAT | 19382.1   | 8.55  | Adaptor-related protein complex 1, sigma 2                | B9  | 50.17 | 1 | 1 | 6.9  | 1 |         |       |   |   |      |   |  |  |  |  |  |  |
| 1347 | Q498C8 | RER1_RAT   | 23086.94  | 9.54  | Protein RER1                                              | B9  | 40.39 | 1 | 1 | 5.6  | 1 |         |       |   |   |      |   |  |  |  |  |  |  |
| 1348 | Q6P742 | PLP2_RAT   | 16830.77  | 6.7   | Proteolipid protein 2                                     | B10 | 54.74 | 1 | 1 | 7.9  | 1 |         |       |   |   |      |   |  |  |  |  |  |  |
